# Supplementary material for: Effects of population aging on quality of life and disease burden: a population-based study
Source: PubMed Central journal article supplement (PMC11731452; doi:10.1186/s41256-024-00393-8), 2025-01-14
Supplement: 41256_2024_393_MOESM1_ESM.pdf [file 41256_2024_393_MOESM1_ESM.pdf]

# Effects of population aging on quality of life and disease burden: a population-based study

## Appendix

|                                                                                                                                      |    |
|--------------------------------------------------------------------------------------------------------------------------------------|----|
| Appendix Text S1. Method of redistributing garbage code .....                                                                        | 1  |
| Appendix Text S2. Estimation method for Health-adjusted life expectancy and Disability-adjusted life years .....                     | 2  |
| Appendix Text S3. Bayesian age-period-cohort regression model .....                                                                  | 4  |
| Appendix Text S4. Population prediction model based on the cohort-component method.....                                              | 6  |
| Appendix Text S5. Decomposition method of Health-adjusted life expectancy.....                                                       | 9  |
| Appendix Text S6. Decomposition method of Disability-adjusted life years .....                                                       | 11 |
| Appendix Text S7. Mathematical expression of scenario analysis.....                                                                  | 13 |
| Appendix Figure S1. Population aging process from 2010 to 2020 .....                                                                 | 14 |
| Appendix Figure S2. Decomposition of changes in Health-adjusted life expectancy from 2010 to 2030, by age group.....                 | 15 |
| Appendix Figure S3. The absolute number of changes in the disease burden in 2030 compared to 2020 .....                              | 16 |
| Appendix Table S1. Summary of the methodological details in this study .....                                                         | 17 |
| Appendix Table S2. Cause and sequelae hierarchy .....                                                                                | 18 |
| Appendix Table S3. Mapping of ICD-10 to cause and sequelae .....                                                                     | 19 |
| Appendix Table S4. Mapping of ICD-10 to garbage code.....                                                                            | 22 |
| Appendix Table S5A. Decomposition of changes in Health-adjusted life expectancy from 2010 to 2020, by cause and sex .....            | 23 |
| Appendix Table S5B. Decomposition of changes in Health-adjusted life expectancy from 2020 to 2030, by cause and sex .....            | 24 |
| Appendix Table S6A. Decomposition of changes in Disability-adjusted life years for males from 2010 to 2020 (95% <i>UIs</i> ) .....   | 25 |
| Appendix Table S6B. Decomposition of changes in Disability-adjusted life years for females from 2010 to 2020 (95% <i>UIs</i> ) ..... | 26 |
| Appendix Table S6C. Decomposition of changes in Disability-adjusted life years for males from 2020 to 2030 (95% <i>UIs</i> ) .....   | 27 |

|                                                                                                                                                                                |    |
|--------------------------------------------------------------------------------------------------------------------------------------------------------------------------------|----|
| Appendix Table S6D. Decomposition of changes in Disability-adjusted life years for females from 2020 to 2030 (95% <i>UIs</i> ) .....                                           | 28 |
| Appendix Table S7. The absolute number and percentage of changes in the disease burden in 2030 compared to 2020 (95% <i>UIs</i> ) .....                                        | 29 |
| Appendix Table S8A. In Scenario 1, the absolute number and percentage of increase in the disease burden for males in 2030 compared to 2020, by cause (95% <i>UIs</i> ) .....   | 30 |
| Appendix Table S8B. In Scenario 1, the absolute number and percentage of increase in the disease burden for females in 2030 compared to 2020, by cause (95% <i>UIs</i> ) ..... | 32 |
| Appendix Table S8C. In Scenario 2, the absolute number and percentage of increase in the disease burden for males in 2030 compared to 2020, by cause (95% <i>UIs</i> ) .....   | 34 |
| Appendix Table S8D. In Scenario 2, the absolute number and percentage of increase in the disease burden for females in 2030 compared to 2020, by cause (95% <i>UIs</i> ) ..... | 36 |
| Appendix Table S9A. Expected burden of disease for males in 2030 and the reduction compared to 2020, by cause (95% <i>UIs</i> ) .....                                          | 38 |
| Appendix Table S9B. Expected burden of disease for females in 2030 and the reduction compared to 2020, by cause (95% <i>UIs</i> ) .....                                        | 40 |

### **Appendix Text S1. Method of redistributing garbage code**

For ICD-10 codes representing unclear symptoms or signs in the underlying cause of death, we redistributed them according to the GBD garbage code list and previous research methods as follows.

$$n_{ij}^{s,after} = (n_{ij}^{s,before} - n_{ij}^{garbage}) \times (1 + n_{ij}^{garbage} / N_{ij}^{t,before})$$

Where  $i, j$  represent sex and age group respectively,  $n_{ij}^{s,before}$  and  $n_{ij}^{s,after}$  represent the total number of a specific cause before and after redistribution,  $N_{ij}^{t,before}$  represents the total number of all-cause before redistribution, and  $n_{ij}^{garbage}$  represents the total number of garbage codes for a specific cause.

## **Appendix Text S2. Estimation method for Health-adjusted life expectancy and Disability-adjusted life years**

We used the number of deaths in Guangzhou and the reference life table from the Global Burden of Disease Study 2019 (GBD 2019) to calculate the years of life lost (YLL), and the method proposed by the WHO to calculate the years lived with disability (YLD). First, YLL was calculated based on the all-cause death dataset in Guangzhou.

$$YLL_{ij} = \sum_1^w N_{ij} \times L_{ij}$$

Where  $i, j$  represent sex and age group respectively,  $N$  is the number of people in a certain age group and gender group who die from a certain cause, and  $L$  is the value of life lost in a certain age group (the life expectancy value corresponding to this age group in the life table). This study used the reference life table obtained from the GBD 2019, which was based on the lowest mortality observed in all age groups globally, to construct the standard life expectancy from the highest value of life expectancy in each age group globally.

Second, we calculate YLD. It is extremely difficult to calculate accurate YLD because of the lack of basic data necessary to calculate them. The WHO has studied the internal relationship between YLD and YLL in various regions of the world and an indirect method for calculating YLD was developed.

$$YLD_{study\ area\ ij} = \frac{YLD_{reference\ area\ ij}}{YLL_{reference\ area\ ij}} \times YLL_{study\ area\ ij}$$

The reference area for this study is China. The YLD-YLL ratios of China from 2010 to 2019 were obtained from the public database of GBD, and the 2020 estimate uses the 2019 reference value.

Third, we used Sullivan's method to incorporate YLD into life tables, Health-adjusted life expectancy (HALE) is calculated by taking into account the loss of life due to disease or disability in each age group.

$$HALE_{ij} = \frac{1}{l_{ij}} \sum_j^w L_{ij} \times (1 - YLD_{ij})$$

Where,  $l_{ij}$  represents the number alive at the start of the interval for sex  $i$  and age  $j$  in the abbreviated life table,  $L_{ij}$  represents the number of years lived in the interval, and  $w$  represents the last age group.

Finally, Disability-adjusted life years (DALY) are defined as the sum of YLL and YLD.

$$DALY = YLL + YLD$$

### Appendix Text S3. Bayesian age-period-cohort regression model

The age-specific epidemiological indicators (mortality, YLL rates, and YLD rates) were projected using the Bayesian age-period-cohort (BAPC) regression model with the Integrated Nested Laplace Approximations (INLA) method. The Bayesian approach attributes separate effects to age, period, and cohort, and extrapolates these effects to make projections. Due to the expectation that effects adjacent in time might be similar, smoothing priors are commonly used for age, period, and cohort effects and to project posterior age-specific epidemiological indicators. A standard choice is the second-order random walk (RW2). According to this model, each point of effect is predicted by linear extrapolation from its two immediate predecessors, plus a random variance from a normal distribution with mean zero.

In the absence of potential overdispersion, the observed epidemiological indicators  $y_{ij}$  in age group  $i$  at time point  $j$  can be assumed to be Poisson distributed with mean  $n_{ij}\lambda_{ij}$ , where  $n_{ij}$  denotes the corresponding person-time of exposure, assumed to be known. In this study, the age index  $i$  from 1 to  $i = 19$  while the period index  $j$  from 1 to  $j = 10$ . The linear predictor  $\eta_{ij} = \log(\lambda_{ij})$  is commonly specified as  $\log(\lambda_{ij}) = \mu + \alpha_i + \beta_j + \gamma_k$ . Here,  $\mu$  represents the general level (intercept), and  $\alpha_i$ ,  $\beta_j$ ,  $\gamma_k$  denote age, period, and cohort effects, respectively. The cohort index  $k$  depends on the age group and period index, but also on the width of the age group and period intervals. Here, it is defined as  $k = M \times (I - i) + j$ , where  $M$  indicates that the age group intervals are  $M$  times wider than the period interval. Consider the age effects, say, then the RW2 prior is given by

$$f(\alpha|\kappa_\alpha) \propto \kappa_\alpha^{\frac{I-2}{2}} \exp\left(-\frac{\kappa_\alpha}{2} \sum_{i=3}^I (\alpha_i - 2\alpha_{i-1} + \alpha_{i-2})^2\right) = \kappa_\alpha^{\frac{I-2}{2}} \exp\left(-\frac{1}{2} \alpha^T Q \alpha\right)$$



#### **Appendix Text S4. Population prediction model based on the cohort-component method**

This study takes into account the policy direction of China, the current development situation of Guangzhou, and the theories of previous studies to set the parameters of population change, including three prediction scenarios of high, medium, and low population development. The population projection assumptions in this study include (a) the birth and death patterns of the population will remain relatively stable over the projection period, (b) the steady and orderly development of the cities over the projection period will not cause major changes in population flow patterns in the short term. Specifically, the parameters of prediction scenarios are set as follows.

(1) Initial population: The population distribution in 2020 was used as the initial population for the three prediction scenarios.

(2) Mortality level: The low, medium, and high prediction scenarios were extrapolated to 2030 using the lower, middle, and upper for 95% confidence intervals of the average annual percentage change in life expectancy from 2010 to 2020, respectively.

(3) Mortality pattern: All three prediction scenarios used the United Nations life table.

(4) Fertility level: The total fertility rate is the average number of children that each woman can have in a population of women of childbearing age between 15 and 49 years and is calculated by summing the age-specific fertility rates of the population. Since the early 1990s, the number of births registered in China's National Population Census and National Population Sample Survey, as well as the total fertility rate calculated from the number of births, have been significantly lower, which may be due to underreporting of birth registration. Although the true total fertility rate is unclear, relatively accurate crude birth rates can be obtained. According to the definition of crude birth rate and total fertility rate, the two are usually linked by a specific parameter. First, this parameter is estimated using specific data and then, according to the derived functional relationship, the total fertility rate is estimated using the known crude birth rate.



$$K = \sum_{x=15}^{49} (h_x \times C_x)$$

$$\beta = CBR/K$$

Where,  $h_x$  is the standardized fertility rate at age  $x$  (fertility rate of women at age  $x$  / total fertility rate),  $C_x$  is the proportion of women at age  $x$  in the total population (number of women at age  $x$  / total population),  $CBR$  is the crude birth rate, and  $\beta$  is the total fertility rate.

After obtaining the true historical total fertility rate, the Bayesian hierarchical model for predicting the total fertility rate developed by the United Nations Population Division was used to estimate the total fertility rate up to 2030. The United Nations Population Division's projections of fertility levels are primarily based on the fertility transition theory. According to the fertility transition theory, the fertility transition can be divided into three stages. The first stage is the initial phase of the fertility transition, which is characterized by a stable and high fertility rate, i.e. the total fertility rate fluctuates above 6. The second stage is the fertility transition period when a country's total fertility rate gradually declines from around 5.5 to the replacement level of 2.1 or below. The third stage is the post-fertility transition period when the total fertility rate rises from below 2.1 to around 2.1. The Bayesian hierarchical model for predicting total fertility rate consists of several levels, the first level contains fertility data for the region that is predicted, and the second level uses average data for countries around the world, assuming that the unknown parameters in each region are a sample of the probability distribution composed of the past fertility transition histories of all countries in the world. In this study, the lower, middle, and upper limits of the 95% confidence intervals of the model output were used for the low, medium, and high prediction scenarios, respectively.

(5) Fertility pattern: The age-specific fertility distribution from the 1% National Population Sample Survey in 2015 was used for the low, medium, and high prediction scenarios.

(6) Newborn sex ratio: The sex ratio at birth is the number of male newborns for every 100 live female newborns. The National Plan on Population Development

(2016-2030), issued by China's State Council in January 2017, emphasizes the need to "strengthen the management of the sex ratio at birth and promote gender equality in society" and sets the expected development target for the population structure as "the sex ratio at birth should not exceed 112 by 2020 and should be reduced to 107 by 2030". The sex ratio at birth in Guangzhou in 2020 is 112.97, which is slightly higher than the national target for 2020, but the gap with the 2030 plan target is not very large. Therefore, it is assumed that the future development direction of Guangzhou's population structure can develop towards the expected target, and the sex ratio at birth is set at 112.97 in the starting year and 107 in 2030 for the three prediction scenarios. The linear interpolation method is used for the remaining years.

(7) Migration level: According to the Guangzhou Statistical Yearbook, the net migration rates of the population in Guangzhou from 2010 to 2020 are as follows: 10.26‰, 6.68‰, 5.58‰, 3.36‰, 5.21‰, 5.44‰, 5.12‰, 8.41‰, 15.33‰, 19.64‰, 17.81‰, and the average annual mobility is 9.35‰. The low, medium, and high prediction scenarios assume annual migration levels of 5‰, 10‰, and 15‰ respectively by 2030.

(8) Migration pattern: The age-specific migration distribution of the 1% National Population Sample Survey in 2015 in Guangzhou was used for the three prediction scenarios.

### Appendix Text S5. Decomposition method of Health-adjusted life expectancy

First, HALE changes are decomposed into age-specific mortality and disability effects. The mortality effect refers to the change in HALE when mortality changes but disability remains unchanged. The disability effect refers to the change in HALE when only disability changes but death remains the same.

$$\Delta_n HALE_x = \frac{{}_n h_x^{t+i} \times {}_n L_x^{t+i} - {}_n h_x^t \times {}_n L_x^t}{l_a^t}$$

$${}_n h_x^t = 1 - {}_n d_x^t$$

$${}_n h_x^{t+i} = 1 - {}_n d_x^{t+i}$$

Where,  $\Delta_n HALE_x$  represents the HALE change of age group  $(x, x + n)$  at  $t$  and  $t + i$  time points.  ${}_n h_x^t$  and  ${}_n h_x^{t+i}$  represent the proportion of the age group  $(x, x + n)$  without disability at  $t$  and  $t + i$  time points.  ${}_n d_x^t$  and  ${}_n d_x^{t+i}$  represent the total YLD per capita of the age group  $(x, x + n)$  at  $t$  and  $t + i$  time points.  ${}_n L_x^t$  and  ${}_n L_x^{t+i}$  represent the number of years lived in the age group  $(x, x + n)$  at  $t$  and  $t + i$  time points.  $l_a^t$  represents the number alive at the start of the 0 age group at  $t$  time points.

$$\Delta_n HALE_x = {}_n MOR_x + {}_n DIS_x$$

$${}_n MOR_x = \left( \frac{{}_n h_x^t + {}_n h_x^{t+i}}{2l_a^t} \right) \times \Delta_n L_x$$

$${}_n DIS_x = \left( \frac{{}_n L_x^t + {}_n L_x^{t+i}}{2l_a^t} \right) \times \Delta_n h_x$$

$$\Delta_n L_x = {}_n L_x^{t+i} - {}_n L_x^t$$

$$\Delta_n h_x = {}_n h_x^{t+i} - {}_n h_x^t$$

Where,  ${}_n MOR_x$  represents the mortality effect in the age group  $(x, x + n)$ , and  ${}_n DIS_x$  represents the disability effect in the age group  $(x, x + n)$ .

Secondly, the mortality and disability effects are further decomposed into the contribution of different causes.

$${}_n MOR_{xk} = {}_n MOR_x \times \frac{{}_n m_x^{t+i} \times {}_n f_{xk}^{t+i} - {}_n m_x^t \times {}_n f_{xk}^t}{{}_n m_x^{t+i} - {}_n m_x^t}$$

$${}_nDIS_{xk} = \left( \frac{{}_nL_x^t + {}_nL_x^{t+i}}{2l_a^t} \right) \times \Delta_n h_{xk}$$

$$\Delta_n h_{xk} = {}_n h_{xk}^{t+i} - {}_n h_{xk}^t$$

$${}_n h_{xk}^t = 1 - {}_n d_{xk}^t = 1 - {}_n d_x^t \times {}_n g_{xk}^t$$

$${}_n h_{xk}^{t+i} = 1 - {}_n d_{xk}^{t+i} = 1 - {}_n d_x^{t+i} \times {}_n g_{xk}^{t+i}$$

$$\Delta_n h_{xk} = {}_n d_x^t \times {}_n g_{xk}^t - {}_n d_x^{t+i} \times {}_n g_{xk}^{t+i}$$

Where,  ${}_n m_x^t$  and  ${}_n m_x^{t+i}$  represent the total mortality of the age group  $(x, x+n)$  at  $t$  and  $t+i$  time points.  ${}_n f_{xk}^t$  and  ${}_n f_{xk}^{t+i}$  represent the proportion of mortality of specific cause  $k$  in the total mortality of the age group  $(x, x+n)$  at  $t$  and  $t+i$  time points.  ${}_n g_{xk}^t$  and  ${}_n g_{xk}^{t+i}$  the proportion of the YLD of specific cause  $k$  in the total YLD of the age group  $(x, x+n)$  at  $t$  and  $t+i$  time points.

## Appendix Text S6. Decomposition method of Disability-adjusted life years

First, we then sorted and organized the data into the following format.

| Age group | Year 1 ( $j = 1$ ) |          |          |           | Year 2 ( $j = 2$ ) |          |          |           |
|-----------|--------------------|----------|----------|-----------|--------------------|----------|----------|-----------|
|           | $d_{i1}$           | $n_{i1}$ | $r_{i1}$ | $s_{i1}$  | $d_{i2}$           | $n_{i2}$ | $r_{i2}$ | $s_{i2}$  |
| 1         | $d_{11}$           | $n_{11}$ | $r_{11}$ | $s_{11}$  | $d_{12}$           | $n_{12}$ | $r_{12}$ | $s_{12}$  |
| 2         | $d_{21}$           | $n_{21}$ | $r_{21}$ | $s_{21}$  | $d_{22}$           | $n_{22}$ | $r_{22}$ | $s_{22}$  |
| $\vdots$  | $\vdots$           | $\vdots$ | $\vdots$ | $\vdots$  | $\vdots$           | $\vdots$ | $\vdots$ | $\vdots$  |
| $p$       | $d_{p1}$           | $n_{p1}$ | $r_{p1}$ | $s_{p1}$  | $d_{p2}$           | $n_{p2}$ | $r_{p2}$ | $s_{p2}$  |
| Total     | $D_1$              | $N_1$    | $R_1$    | $S_1 = 1$ | $D_2$              | $N_2$    | $R_2$    | $S_2 = 1$ |

Where,  $d_{ij}$ ,  $n_{ij}$ ,  $r_{ij}$ , and  $s_{ij}$  represent the age-specific number of DALY, age-specific population size, age-specific DALY crude rate, and proportion of age-specific population among the total population in the  $i$  age group and the  $j$  year respectively.  $D_{ij}$ ,  $N_{ij}$ ,  $R_{ij}$ , and  $S_{ij}$  represent the totals of the columns.

Then, the main effect of the three factors is represented by  $M_p$ ,  $M_s$ , and  $M_m$  respectively, the two-way interaction of the three factors is represented by  $I_{ps}$ ,  $I_{pm}$ , and  $I_{sm}$  respectively, and the three-way interaction of the three factors is represented by  $I_{psm}$ , which can be calculated according to the following formula.

$$\begin{aligned}
 M_p &= \sum_{i=1}^p (N_2 - N_1) \times s_{i1} \times r_{i1} \\
 M_s &= \sum_{i=1}^p N_1 \times (s_{i2} - s_{i1}) \times r_{i1} \\
 M_m &= \sum_{i=1}^p N_1 \times s_{i1} \times (r_{i2} - r_{i1}) \\
 I_{ps} &= \sum_{i=1}^p (N_2 - N_1) \times (s_{i2} - s_{i1}) \times r_{i1} \\
 I_{pm} &= \sum_{i=1}^p (N_2 - N_1) \times s_{i1} \times (r_{i2} - r_{i1}) \\
 I_{sm} &= \sum_{i=1}^p N_1 \times (s_{i2} - s_{i1}) \times (r_{i2} - r_{i1}) \\
 I_{psm} &= \sum_{i=1}^p (N_2 - N_1) \times (s_{i2} - s_{i1}) \times (r_{i2} - r_{i1})
 \end{aligned}$$

In the formula, subscripts  $p$ ,  $s$ , and  $m$  indicate population size, age structure, and all other reasons respectively.

Finally, the contribution of each factor is represented by  $AS_{III}$ ,  $PS_{III}$ , and  $ASR_{III}$  respectively, and is calculated according to the following formula.

$$AS_{III} = M_s + \frac{1}{2}I_{ps} + \frac{1}{2}I_{sm} + \frac{1}{3}I_{psm}$$

$$PS_{III} = M_p + \frac{1}{2}I_{ps} + \frac{1}{2}I_{pm} + \frac{1}{3}I_{pSm}$$

$$ASR_{III} = M_m + \frac{1}{2}I_{pm} + \frac{1}{2}I_{sm} + \frac{1}{3}I_{pSm}$$

### **Appendix Text S7. Mathematical expression of scenario analysis**

Three scenarios were developed to analyze the relative relationship between changes in the burden of premature death (YLL rates) and disability (YLD rates) and population change.

1. Scenario 1 explores the influence of population change on the burden of disease by assuming that YLL and YLD rates in 2030 remain at 2020 levels.

$$R = \text{Rates of DoB}_{2020} \times (\text{POP}_{2030} - \text{POP}_{2020})$$

2. Scenario 2 explores the influence of population change on the burden of disease by assuming that YLL and YLD rates in 2030 change from historical trends (modeling projections).

$$R = \text{Rates of DoB}_{2030} \times (\text{POP}_{2030} - \text{POP}_{2020})$$

3. Scenario 3 assumes that the health effects of population changes are offset in 2030 without increasing the absolute numbers of YLL and YLD, i.e. that the absolute numbers of YLL and YLD in 2030 remain at the 2020 level and that the expected levels of burden of premature death and disability are achieved relative to the levels to be controlled in 2020.

$$R = \frac{\text{Absolute numbers of DoB}_{2020} \times (\text{POP}_{2030} - \text{POP}_{2020})}{\text{POP}_{2030} \times \text{POP}_{2020}}$$

where the subscripts 2020 and 2030 represent the years, DoB represents YLL or YLD, and POP represents population distribution.

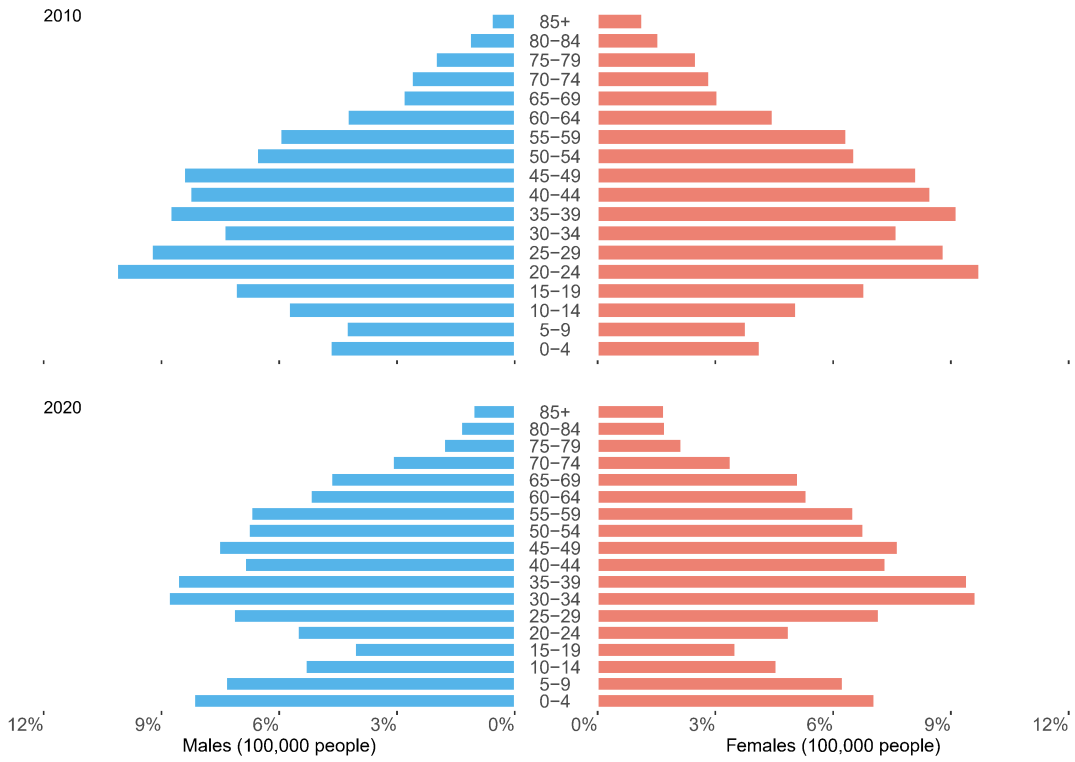

**Appendix Figure S1. Population aging process from 2010 to 2020**



A) 2010 — 2020

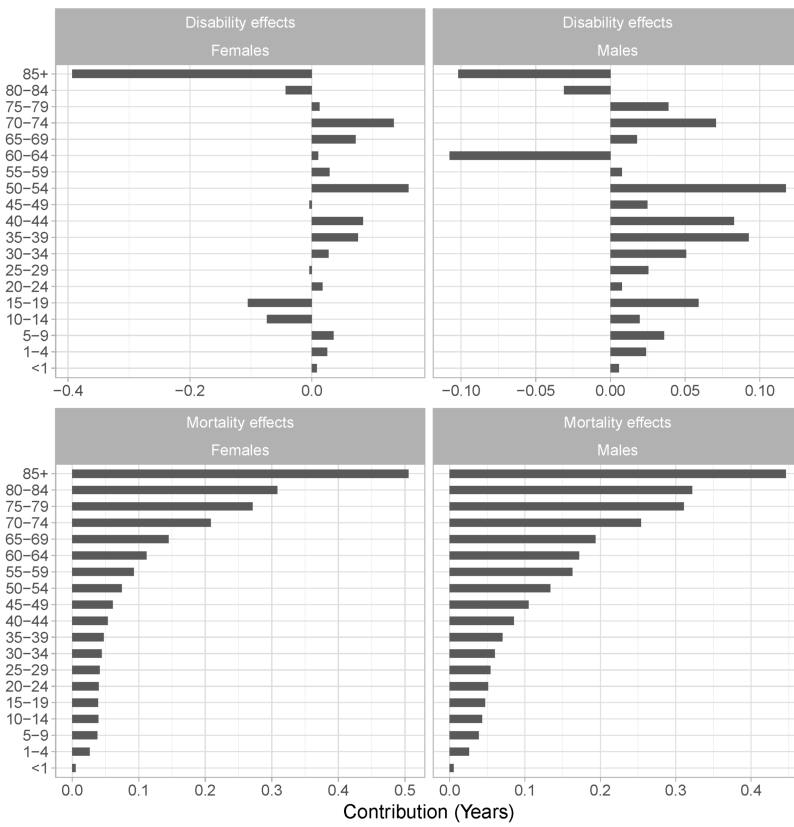

B) 2020 — 2030

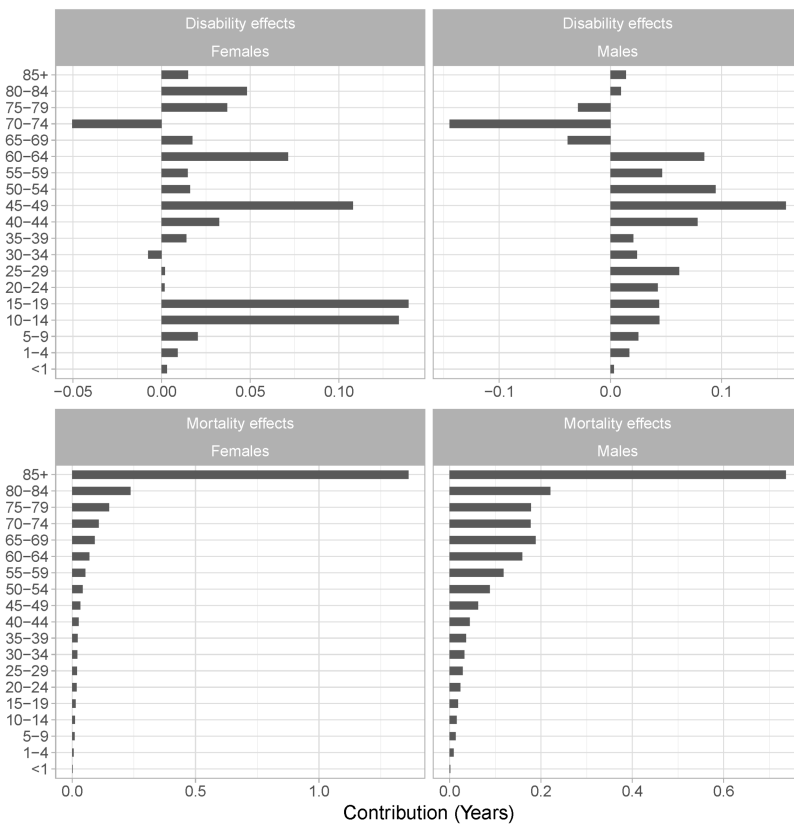

**Appendix Figure S2. Decomposition of changes in Health-adjusted life expectancy from 2010 to 2030, by age group**

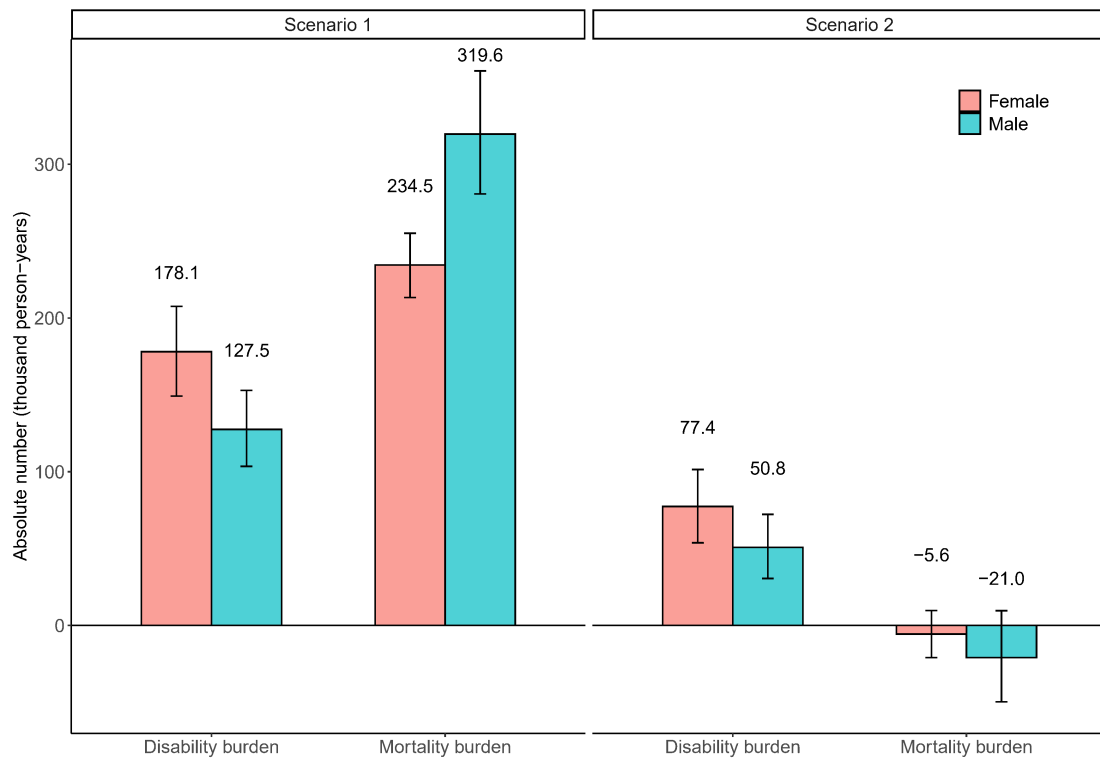

**Appendix Figure S3. The absolute number of changes in the disease burden in 2030 compared to 2020**

**Appendix Table S1. Summary of the methodological details in this study**

| <b>Methods</b>                                                               | <b>Tool/software used</b>                                       | <b>Objects of the analysis</b>                                                                                      | <b>Note</b>             |
|------------------------------------------------------------------------------|-----------------------------------------------------------------|---------------------------------------------------------------------------------------------------------------------|-------------------------|
| Redistributing garbage code                                                  | Programming in R (v4.1.0)                                       | Surveillance dataset on cause-of-death                                                                              | Appendix Text S1        |
| Measuring Health-adjusted life expectancy and Disability-adjusted life years | Programming in R (v4.1.0)                                       | Surveillance dataset on cause-of-death and registered population dataset                                            | Appendix Text S2        |
| Bayesian age-period-cohort model                                             | BAPC package (v0.0.36) based on R (v4.1.0)                      | Distribution of mortality and disability over the current period                                                    | Appendix Text S3        |
| Population prediction model                                                  | PADIS-INT (v1.0); bayesTFR package (v7.3.0) based on R (v4.1.0) | Distribution of population change over the current period                                                           | Appendix Text S4        |
| Decomposition model                                                          | Programming in R (v4.1.0)                                       | Health-adjusted life expectancy and Disability-adjusted life years for the current period and the projection period | Appendix Text S5 and S6 |
| Scenario analysis                                                            | Programming in R (v4.1.0)                                       | Assumed future levels of disease burden and projected population distributions                                      | Appendix Text S7        |

**Appendix Table S2. Cause and sequelae hierarchy**

|            | <b>Level 1</b>                                                    | <b>Level 2</b>                               |
|------------|-------------------------------------------------------------------|----------------------------------------------|
| <b>(A)</b> | <b>Communicable, maternal, neonatal, and nutritional diseases</b> |                                              |
| (1)        |                                                                   | HIV/AIDS and sexually transmitted infections |
| (2)        |                                                                   | Respiratory infections and tuberculosis      |
| (3)        |                                                                   | Enteric infections                           |
| (4)        |                                                                   | Neglected tropical diseases and malaria      |
| (5)        |                                                                   | Maternal and neonatal disorders              |
| (6)        |                                                                   | Nutritional deficiencies                     |
| (7)        |                                                                   | Other infectious diseases                    |
| <b>(B)</b> | <b>Non-communicable diseases</b>                                  |                                              |
| (8)        |                                                                   | Neoplasms                                    |
| (9)        |                                                                   | Cardiovascular diseases                      |
| (10)       |                                                                   | Chronic respiratory diseases                 |
| (11)       |                                                                   | Digestive diseases                           |
| (12)       |                                                                   | Neurological disorders                       |
| (13)       |                                                                   | Mental disorders                             |
| (14)       |                                                                   | Substance use disorders                      |
| (15)       |                                                                   | Diabetes and kidney diseases                 |
| (16)       |                                                                   | Skin and subcutaneous diseases               |
| (17)       |                                                                   | Musculoskeletal disorders                    |
| (18)       |                                                                   | Other non-communicable diseases              |
| <b>(C)</b> | <b>Injuries</b>                                                   |                                              |
| (19)       |                                                                   | Transport injuries                           |
| (20)       |                                                                   | Unintentional injuries                       |
| (21)       |                                                                   | Self-harm and interpersonal violence         |

**Appendix Table S3. Mapping of ICD-10 to cause and sequelae**

| <b>Level 2</b>                               | <b>ICD-10</b>                                                                                                                                                                                                                                                                                                                                                                                                                                                                                                                                  |
|----------------------------------------------|------------------------------------------------------------------------------------------------------------------------------------------------------------------------------------------------------------------------------------------------------------------------------------------------------------------------------------------------------------------------------------------------------------------------------------------------------------------------------------------------------------------------------------------------|
| HIV/AIDS and sexually transmitted infections | A50-A58, A60-A60.9, A63-A63.8, B20-B24.9, B63, F02.4, I98.0, K67.0-K67.2, M03.1, M73.0-M73.1                                                                                                                                                                                                                                                                                                                                                                                                                                                   |
| Respiratory infections and tuberculosis      | A10-A14, A15-A19.9, A48.1, A70, B90-B90.9, B97.4-B97.6, H70-H70.9, J00-J02.8, J03-J03.8, J04-J04.2, J05-J05.1, J06.0-J06.8, J09-J15.8, J16-J16.9, J20-J21.9, J36-J36.0, J91.0, K67.3, K93.0, M49.0, N74.1, P23.0-P23.4, P37.0, U04-U04.9, U84.3                                                                                                                                                                                                                                                                                                |
| Enteric infections                           | A00-A00.9, A01.0-A09.9, A80-A80.9, K52.1, R19.7                                                                                                                                                                                                                                                                                                                                                                                                                                                                                                |
| Neglected tropical diseases and malaria      | A68-A68.9, A69.2-A69.9, A75-A75.9, A77-A79.9, A82-A82.9, A90-A96.9, A98-A98.8, B33.0-B33.1, B50-B54.0, B55.0, B56-B57.5, B60-B60.8, B65-B67.9, B69-B72.0, B74.3-B75, B77-B77.9, B83-B83.8, K93.1, P37.1, U06-U06.9                                                                                                                                                                                                                                                                                                                             |
| Other infectious diseases                    | A20-A28.9, A32-A39.9, A48.2, A48.4-A48.5, A65-A65.0, A69-A69.1, A74, A74.8-A74.9, A81-A81.9, A83-A89.9, B00-B06.9, B10-B10.8, B15-B16.2, B17.0, B17.2, B19.1, B25-B27.9, B29.4, B33, B33.3-B33.8, B47-B48.8, B91, B94.1, B95-B95.5, D70.3, D89.3, F02.1, F07.1, G00.0-G00.8, G03-G03.8, G04-G05.8, G14-G14.6, G21.3, I00, I02, I02.9, I98.1, K67.8, K75.3, K76.3, K77.0, M49.1, M89.6, P35-P35.9, P37, P37.2, P37.5-P37.9, U82-U84, U85-U89, Z16-Z16.3                                                                                         |
| Maternal and neonatal disorders              | C58-C58.0, N96, N98-N98.9, O00-O07.9, O09-O16.9, O20-O26.9, O28-O36.9, O40-O48.1, O60-O77.9, O80-O92.7, O96-O98.6, O98.8-P04.2, P04.5-P05.9, P07-P15.9, P19-P22.9, P24-P29.9, P36-P36.9, P38-P39.9, P50-P61.9, P70-P70.1, P70.3-P72.9, P74-P78.9, P80-P81.9, P83-P84, P90-P94.9, P96, P96.3-P96.4, P96.8                                                                                                                                                                                                                                       |
| Nutritional deficiencies                     | D50.1-D50.8, D51-D52.0, D52.8-D53.9, E00-E02, E40-E46.9, E51-E61.9, E63-E64.0, E64.2-E64.9, M12.1                                                                                                                                                                                                                                                                                                                                                                                                                                              |
| Neoplasms                                    | C00-C13.9, C15-C22.8, C23-C25.9, C30-C34.9, C37-C38.8, C40-C41.9, C43-C45.9, C47-C54.9, C56-C57.8, C60-C63.8, C64-C67.9, C68.0-C68.8, C69.0-C69.8, C70-C73.9, C75-C75.8, C81-C86.6, C88-C91.0, C91.2-C91.3, C91.6, C92-C92.6, C93-C93.1, C93.3, C93.8, C94-C96.9, D00.1-D00.2, D01.0-D01.3, D02.0-D02.3, D03-D06.9, D07.0-D07.2, D07.4-D07.5, D09.0, D09.2-D09.3, D09.8, D10.0-D10.7, D11-D12.9, D13.0-D13.7, D14.0-D14.3, D15-D16.9, D22-D24.9, D26.0-D27.9, D28.0-D28.1, D28.7, D29.0-D29.8, D30.0-D30.8, D31-D36, D36.1-D36.7, D37.1-D37.5, |

| <b>Level 2</b>                  | <b>ICD-10</b>                                                                                                                                                                                                                                                                                                              |
|---------------------------------|----------------------------------------------------------------------------------------------------------------------------------------------------------------------------------------------------------------------------------------------------------------------------------------------------------------------------|
|                                 | D38.0-D38.5, D39.1-D39.2, D39.8, D40.0-D40.8, D41.0-D41.8, D42-D43.9, D44.0-D44.8, D45-D47.9, D48.0-D48.6, D49.2-D49.4, D49.6, K62.0-K62.1, K63.5, N60-N60.9, N84.0-N84.1, N87-N87.9                                                                                                                                       |
| Cardiovascular diseases         | B33.2, G45-G46.8, I01-I01.9, I02.0, I05-I09.9, I11-I11.9, I20-I25.9, I27.0, I27.2, I28-I28.9, I30-I31.1, I31.8-I37.8, I38-I41.9, I42.1-I42.8, I43-I43.9, I47-I48.9, I51.0-I51.4, I60-I63.9, I65-I66.9, I67.0-I67.3, I67.5-I67.6, I68.0-I68.2, I69.0-I69.3, I70.2-I70.8, I71-I73.9, I77-I83.9, I86-I89.0, I89.9, I98, K75.1 |
| Chronic respiratory diseases    | D86-D86.2, D86.9, G47.3, J30-J35.9, J37-J39.9, J41-J46.9, J60-J63.8, J65-J68.9, J70, J70.8-J70.9, J82, J84-J84.9, J91, J91.8-J92.9                                                                                                                                                                                         |
| Digestive diseases              | B18-B18.9, I84-I85.9, I98.2, K20-K20.9, K22-K22.6, K22.8-K29.9, K31-K31.8, K35-K38.9, K40-K42.9, K44-K46.9, K50-K52, K52.2-K52.9, K55-K62, K62.2-K62.6, K62.8-K62.9, K64-K64.9, K66.8, K67, K68, K70-K70.3, K71.7, K73-K75, K75.2, K75.4-K76.2, K76.4-K77, K77.8, K80-K83.9, K85-K86.9, K90-K90.9, K92.8, K93.8, M09.1     |
| Neurological disorders          | F00-F02.0, F02.2-F02.3, F02.8-F03.9, G10-G13.8, G20-G20.9, G23-G24, G24.1-G25.0, G25.2-G25.3, G25.5, G25.8-G26.0, G30-G31.1, G31.8-G31.9, G35-G37.9, G40-G41.9, G61-G61.9, G70-G71.1, G71.3-G72, G72.2-G73.7, G90-G90.9, G95-G95.9, M33-M33.9                                                                              |
| Mental disorders                | F24, F50.0-F50.5                                                                                                                                                                                                                                                                                                           |
| Substance use disorders         | E24.4, F10-F16.9, F18-F18.9, G31.2, G62.1, G72.1, P04.3-P04.4, P96.1, Q86.0, R78.0-R78.5, X45-X45.9, X65-X65.9, Y15-Y15.9                                                                                                                                                                                                  |
| Diabetes and kidney diseases    | D63.1, E10-E11.9, I12-I13.9, N00-N08.8, N15.0, N18-N18.9, P70.2, Q61-Q62.8                                                                                                                                                                                                                                                 |
| Skin and subcutaneous diseases  | A46-A46.0, A66-A67.9, B86, D86.3, I89.1-I89.8, L00-L05.9, L08-L08.9, L10-L14.0, L51-L51.9, L88-L89.9, L97-L98.4, M72.5-M72.6                                                                                                                                                                                               |
| Musculoskeletal disorders       | I27.1, I67.7, L93-L93.2, M00-M03.0, M03.2-M03.6, M05-M09.0, M09.2-M09.8, M30-M32.9, M34-M36.8, M40-M43.1, M65-M65.0, M71.0-M71.1, M80-M82.8, M86.3-M86.4, M87-M87.0, M88-M89.0, M89.5, M89.7-M89.9                                                                                                                         |
| Other non-communicable diseases | D25-D26, D28.2, D52.1, D55-D58.9, D59.0-D59.3, D59.5-D59.6, D60-D61.9, D64.0, D66-D67, D68.0-D69.8, D70-D70.2, D70.4-D75.8, D76-D78.8, D86.8, D89-D89.2,                                                                                                                                                                   |

| <b>Level 2</b>                       | <b>ICD-10</b>                                                                                                                                                                                                                                                                                                                                                                                                                                                                                                                                                                                                                                                                                                                       |
|--------------------------------------|-------------------------------------------------------------------------------------------------------------------------------------------------------------------------------------------------------------------------------------------------------------------------------------------------------------------------------------------------------------------------------------------------------------------------------------------------------------------------------------------------------------------------------------------------------------------------------------------------------------------------------------------------------------------------------------------------------------------------------------|
|                                      | E03-E07.1, E09-E09.9, E15.0, E16.0-E16.9, E20-E24.3, E24.8-E34, E34.1-E34.8, E36-E36.8, E65-E68, E70-E85.2, E88-E89.9, G21.0-G21.1, G24.0, G25.1, G25.4, G25.6-G25.7, G71.2, G72.0, G93.7, G97-G97.9, I95.2-I95.3, I97-I97.9, I98.9, J70.0-J70.5, J95-J95.9, K43-K43.9, K52.0, K62.7, K91-K91.9, K94-K95.8, M87.1, N10-N12.9, N13.6, N14-N15, N15.1-N16.8, N20-N23.0, N25-N28.1, N29-N30.3, N30.8-N32.0, N32.3-N32.4, N34-N34.3, N36-N36.9, N39-N39.2, N41-N41.9, N44-N44.0, N45-N45.9, N49-N49.9, N65-N65.1, N72-N72.0, N75-N77.8, N80-N81.9, N83-N83.9, N99-N99.9, P96.0, P96.2, P96.5, Q00-Q07.9, Q10.4-Q18.9, Q20-Q28.9, Q30-Q36, Q37-Q45.9, Q50-Q60.6, Q63-Q86, Q86.1-Q87.8, Q89-Q89.8, Q90-Q93.9, Q95-Q99.8, R50.2, R95-R95.9 |
| Transport injuries                   | V00-V86.9, V87.2-V87.3, V88.2-V88.3, V90-V98.8                                                                                                                                                                                                                                                                                                                                                                                                                                                                                                                                                                                                                                                                                      |
| Unintentional injuries               | L55-L55.9, L56.3, L56.8-L56.9, L58-L58.9, N30.4, W00-W46.2, W49-W62.9, W64-W70.9, W73-W75.9, W77-W81.9, W83-W94.9, W97.9, W99-X06.9, X08-X39.9, X47-X48.9, X50-X54.9, X57-X58.9, Y40-Y84.9, Y88-Y88.3                                                                                                                                                                                                                                                                                                                                                                                                                                                                                                                               |
| Self-harm and interpersonal violence | U00-U03, X60-X64.9, X66-X83.9, X85-Y08.9, Y35-Y38.9, Y87.0-Y87.1, Y89.0-Y89.1                                                                                                                                                                                                                                                                                                                                                                                                                                                                                                                                                                                                                                                       |

**Appendix Table S4. Mapping of ICD-10 to garbage code**

| Garbage code hierarchy | ICD-10                                                                                                                                                                                                                                                                                                                                                                                                                                                                                                                                                                                                                                                                                                                                                                                                                                                                                                                                                                                                                                                                                                                                                                                                                                                                                                                                                                                                                                                                                                                                                                                                   |
|------------------------|----------------------------------------------------------------------------------------------------------------------------------------------------------------------------------------------------------------------------------------------------------------------------------------------------------------------------------------------------------------------------------------------------------------------------------------------------------------------------------------------------------------------------------------------------------------------------------------------------------------------------------------------------------------------------------------------------------------------------------------------------------------------------------------------------------------------------------------------------------------------------------------------------------------------------------------------------------------------------------------------------------------------------------------------------------------------------------------------------------------------------------------------------------------------------------------------------------------------------------------------------------------------------------------------------------------------------------------------------------------------------------------------------------------------------------------------------------------------------------------------------------------------------------------------------------------------------------------------------------|
| Level 1                | <p>A40-A41.9, A48.0, A48.3, A49.0-A49.1, A59-A59.9, A71-A71.9, A74.0, B07-B07.9, B30-B30.9, B35-B36.9, B85-B85.4, B87-B88.9, B94.0, D50-D50.0, D50.9, D62-D63.0, D63.8-D64, D64.1-D65.9, D68, D69.9, E15, E16, E50-E50.9, E64.1, E85.3-E87.6, E87.8-E87.9, F06.2-F06.4, F07.2, F09-F09.9, F19-F23.9, F25-F49, F51-F99.0, G06-G08.0, G32-G32.8, G43-G44.2, G44.4-G44.8, G47-G47.2, G47.4-G47.9, G50-G60.9, G62-G62.0, G62.2-G65.2, G80-G83.9, G89-G89.4, G91-G91.2, G91.4-G93, G93.1-G93.2, G93.4-G93.6, G94.0-G94.8, G99-H05, H05.2-H69.9, H71-H99, I26-I26.9, I31.2-I31.4, I46-I46.9, I50.0-I50.4, I76, I95-I95.1, I95.8-I95.9, J69-J69.9, J80-J80.9, J81.0, J85-J85.3, J86-J86.9, J93-J93.1, J93.8-J93.9, J94.2, J96-J96.9, J98.1-J98.3, K00-K19, K30, K65-K66.1, K66.9, K68.1-K68.9, K71-K71.6, K71.8-K72.9, K75.0, L20-L30.9, L40-L50.9, L52-L54.8, L56-L56.2, L56.4-L56.5, L57-L57.9, L59-L68.9, L70-L76.8, L80-L87.9, L90-L92.9, L94-L96, L98.5-L99.8, M04, M10-M12.0, M12.2-M29, M37-M39, M43.2-M49, M49.2-M64, M65.1-M71, M71.2-M72.4, M72.8-M73, M73.8-M79.9, M83-M86.2, M86.5-M86.9, M87.2-M87.9, M89.1-M89.4, M90-M99.9, N17-N17.9, N19-N19.9, N32.1-N32.2, N32.8-N33.8, N35-N35.9, N37-N37.8, N39.3-N39.8, N42-N43.4, N44.1-N44.8, N46-N48.9, N50-N53.9, N61-N64.9, N82-N82.9, N91-N91.5, N95, N95.1-N95.9, N97-N97.9, R02-R02.9, R03.1, R07.0, R08-R09, R09.3, R11-R12.0, R14-R19.6, R19.8-R23, R23.1-R30.9, R32-R50.1, R50.8-R57.9, R58.0-R72.9, R74-R78, R78.6-R94.8, R96-R99.9, U05, U07-U81, U89.9-U99, X40-X44.9, X46-X46.9, X49-X49.9, Y10-Y14.9, Y16-Y19.9, Z00-Z15.8, Z17-unsp.</p> |
| Level 2                | <p>A14.9, A29-A30.9, A45-A45.9, A47-A48, A48.8-A49, A49.3-A49.9, A61-A62, A72-A73, A76, A97, B08-B09, B11-B14, B28-B29, B31-B32.4, B34-B34.9, B61-B62, B68-B68.9, B73-B74.2, B76-B76.9, B78-B81.8, B84, B92-B94, B94.8-B94.9, B95.6-B97.3, B97.7-B99.9, D59, D59.4, D59.8-D59.9, F17-F17.9, G44.3, G91.3, G93.0, G93.3, I10-I10.9, I15-I15.9, I27, I27.8-I27.9, I50, I50.8-I50.9, I67.4, I70-I70.1, I70.9, I74-I75.8, J81, J81.1, J90-J90.0, J94-J94.1, J94.8-J94.9, K92.0-K92.2, N70-N71.9, N73-N74.0, N74.2-N74.8, R03-R03.0, R04-R06.9, R09.0-R09.2, R09.8-R10.9, R13-R13.9, R23.0, R58, S00-T98.3, W47-W48, W63, W71-W72, W76-W76.9, W82, W95-W97, W98, X07, X55-X56, X59-X59.9, Y20-Y34.9, Y86-Y87, Y87.2, Y89, Y89.9-Y99.9</p>                                                                                                                                                                                                                                                                                                                                                                                                                                                                                                                                                                                                                                                                                                                                                                                                                                                                     |



**Appendix Table S5A. Decomposition of changes in Health-adjusted life expectancy from 2010 to 2020, by cause and sex**

| Causes                                       | Males                 |                        | Females               |                        |
|----------------------------------------------|-----------------------|------------------------|-----------------------|------------------------|
|                                              | Mortality effects (%) | Disability effects (%) | Mortality effects (%) | Disability effects (%) |
| HIV/AIDS and sexually transmitted infections | 0.01 (0.34)           | -0.01 (-0.17)          | 0.01 (0.55)           | -0.01 (-0.53)          |
| Respiratory infections and tuberculosis      | -0.10 (-3.69)         | 0.01 (1.56)            | -0.61 (-28.42)        | 0.01 (9.37)            |
| Enteric infections                           | 0.05 (2.12)           | -0.03 (-6.58)          | 0.03 (1.36)           | -0.03 (-45.73)         |
| Neglected tropical diseases and malaria      | 0.01 (0.09)           | -0.02 (-3.47)          | -0.01 (-0.02)         | -0.03 (-41.43)         |
| Maternal and neonatal disorders              | 0.00 (0.00)           | -0.01 (-1.21)          | 0.00 (0.00)           | -0.01 (-5.73)          |
| Nutritional deficiencies                     | 0.70 (27.32)          | -0.11 (-24.02)         | 1.61 (74.95)          | -0.03 (-41.10)         |
| Neoplasms                                    | 1.09 (42.11)          | 0.01 (0.61)            | 0.37 (17.01)          | 0.01 (3.99)            |
| Cardiovascular diseases                      | 1.63 (63.13)          | 0.02 (4.14)            | 4.45 (206.92)         | -0.07 (-96.95)         |
| Chronic respiratory diseases                 | -3.44 (-133.27)       | 0.08 (18.21)           | -6.20 (-288.49)       | 0.18 (254.92)          |
| Digestive diseases                           | 0.66 (25.52)          | -0.01 (-2.07)          | 0.33 (15.46)          | -0.01 (-3.39)          |
| Neurological disorders                       | 0.37 (14.42)          | -0.01 (-3.00)          | 0.36 (16.97)          | -0.02 (-32.84)         |
| Mental disorders                             | 0.04 (1.43)           | 0.04 (8.76)            | -0.01 (-0.17)         | 0.07 (100.69)          |
| Substance use disorders                      | -0.03 (-1.15)         | 0.02 (3.43)            | 0.00 (0.00)           | 0.00 (0.00)            |
| Diabetes and kidney diseases                 | 0.05 (2.00)           | 0.10 (23.41)           | -0.24 (-11.14)        | 0.14 (193.62)          |
| Skin and subcutaneous diseases               | -0.15 (-5.84)         | 0.11 (25.61)           | -0.01 (-0.48)         | -0.02 (-31.29)         |
| Musculoskeletal disorders                    | -0.02 (-0.61)         | -0.19 (-43.01)         | -0.01 (-0.27)         | -0.08 (-119.74)        |
| Transport injuries                           | 0.08 (2.93)           | 0.01 (0.26)            | -0.03 (-1.52)         | -0.01 (-7.95)          |
| Unintentional injuries                       | -0.18 (-6.98)         | -0.01 (-0.77)          | 0.01 (0.36)           | 0.01 (0.87)            |
| Self-harm and interpersonal violence         | 0.92 (35.83)          | -0.13 (-30.32)         | 1.29 (59.84)          | -0.25 (-361.80)        |
| Other infectious diseases                    | -0.05 (-2.04)         | 0.01 (0.55)            | 0.01 (0.39)           | 0.01 (7.87)            |
| Other non-communicable diseases              | 0.06 (2.15)           | 0.01 (2.41)            | 0.19 (8.77)           | -0.05 (-77.85)         |
| Total                                        | 1.70 (65.89)          | -0.11 (-0.25)          | 1.55 (72.09)          | -0.21 (-3.00)          |

**Appendix Table S5B. Decomposition of changes in Health-adjusted life expectancy from 2020 to 2030, by cause and sex**

| Causes                                       | Males                 |                        | Females               |                        |
|----------------------------------------------|-----------------------|------------------------|-----------------------|------------------------|
|                                              | Mortality effects (%) | Disability effects (%) | Mortality effects (%) | Disability effects (%) |
| HIV/AIDS and sexually transmitted infections | 0.01 (0.37)           | 0.01 (0.35)            | -0.01 (-0.10)         | 0.01 (0.19)            |
| Respiratory infections and tuberculosis      | 0.09 (4.06)           | 0.02 (4.06)            | 0.14 (6.04)           | 0.01 (1.75)            |
| Enteric infections                           | -0.01 (-0.04)         | -0.03 (-4.55)          | -0.01 (-0.03)         | 0.01 (0.26)            |
| Neglected tropical diseases and malaria      | -0.01 (-0.15)         | 0.02 (2.95)            | -0.01 (-0.03)         | 0.05 (7.92)            |
| Maternal and neonatal disorders              | -0.01 (-0.03)         | 0.01 (2.46)            | -0.01(-0.08)          | 0.02 (2.91)            |
| Nutritional deficiencies                     | 0.01 (0.42)           | -0.01 (-0.33)          | -0.41 (-18.11)        | -1.88 (-303.74)        |
| Neoplasms                                    | 0.17 (8.00)           | 0.08 (14.30)           | 0.33 (14.27)          | 0.04 (7.24)            |
| Cardiovascular diseases                      | 1.06 (49.24)          | 0.30 (53.83)           | 2.09 (91.16)          | 0.58 (93.75)           |
| Chronic respiratory diseases                 | 0.11 (5.12)           | 0.20 (36.60)           | -0.04 (-1.62)         | 0.08 (12.29)           |
| Digestive diseases                           | 0.09 (4.39)           | 0.07 (13.38)           | 0.20 (8.68)           | 0.10 (16.06)           |
| Neurological disorders                       | -0.01 (-0.45)         | 0.02 (3.67)            | -0.08 (-3.54)         | -0.11 (-18.43)         |
| Mental disorders                             | -0.01 (-0.03)         | 0.29 (52.97)           | 0.01 (0.13)           | 0.39 (62.16)           |
| Substance use disorders                      | 0.01 (0.17)           | 0.01 (2.08)            | -0.01 (-0.04)         | -0.01 (-0.08)          |
| Diabetes and kidney diseases                 | 0.01 (0.18)           | 0.24 (43.23)           | -0.27 (-11.92)        | 0.15 (23.76)           |
| Skin and subcutaneous diseases               | -0.01 (-0.28)         | -0.99 (-180.11)        | -0.01 (-0.06)         | -0.09 (-15.30)         |
| Musculoskeletal disorders                    | -0.01 (-0.31)         | -0.95 (-172.71)        | -0.01 (-0.06)         | -0.30 (-47.94)         |
| Transport injuries                           | 0.02 (1.00)           | 0.05 (9.19)            | 0.02 (0.66)           | 0.03 (5.39)            |
| Unintentional injuries                       | 0.01 (0.15)           | 0.01 (1.31)            | -0.01 (-0.61)         | 0.01 (0.74)            |
| Self-harm and interpersonal violence         | 0.07 (3.42)           | 0.15 (28.17)           | 0.04 (1.85)           | 0.23 (37.66)           |
| Other infectious diseases                    | 0.01 (0.15)           | 0.01 (0.48)            | -0.01 (-0.01)         | 0.01 (0.30)            |
| Other non-communicable diseases              | 0.04 (1.17)           | 0.38 (69.63)           | 0.05 (1.98)           | 0.84 (135.39)          |
| Total                                        | 1.66 (77.14)          | -0.10 (-19.03)         | 2.02 (88.04)          | 0.14 (22.27)           |

**Appendix Table S6A. Decomposition of changes in Disability-adjusted life years for males from 2010 to 2020 (95% UIs)**

| Causes                                       | Age structure                 | Population size               | All other reasons                |
|----------------------------------------------|-------------------------------|-------------------------------|----------------------------------|
| HIV/AIDS and sexually transmitted infections | -170.2 (-174.9, -165.7)       | 539.7 (536.5, 539.7)          | -922.9 (-922.9, -891.0)          |
| Respiratory infections and tuberculosis      | 1934.3 (1899.9, 1968.2)       | 2944.5 (2924.9, 2945.0)       | -4456.4 (-4552.1, -4300.7)       |
| Enteric infections                           | 653.5 (599.6, 703.7)          | 900.9 (888.1, 905.9)          | 3773.2 (3506.7, 3773.2)          |
| Neglected tropical diseases and malaria      | 434.7 (386.4, 482.9)          | 631.0 (594.6, 642.9)          | 3660.0 (3120.5, 3660.0)          |
| Maternal and neonatal disorders              | 1436.5 (1384.8, 1485.6)       | 3033.2 (3033.2, 3054.4)       | -6046.2 (-6305.5, -6046.2)       |
| Nutritional deficiencies                     | 1553.9 (1312.7, 1793.4)       | 4754.3 (4645.0, 4948.4)       | 6698.1 (3674.9, 6698.1)          |
| Neoplasms                                    | 31430.3 (31392.4, 31464.3)    | 45154.4 (45143.7, 45192.3)    | -67849.6 (-67849.6, -67644.7)    |
| Cardiovascular diseases                      | 38408.5 (38299.7, 38511.6)    | 42611.9 (42550.8, 42611.9)    | -40181.3 (-41016.6, -39574.2)    |
| Chronic respiratory diseases                 | 15938.9 (15877.3, 16000.0)    | 14416.2 (14372.2, 14416.2)    | -34887.4 (-34887.4, -34036.8)    |
| Digestive diseases                           | 3858.3 (3815.1, 3900.3)       | 6788.5 (6774.1, 6788.5)       | -7748.0 (-7748.0, -7577.9)       |
| Neurological disorders                       | -642.7 (-858.8, -431.9)       | 4464.7 (4418.4, 4511.9)       | -1839.3 (-3898.4, -257.0)        |
| Mental disorders                             | 3427.2 (3323.2, 3537.0)       | 3070.3 (3000.7, 3118.5)       | 716.1 (-988.8, 716.1)            |
| Substance use disorders                      | -894.5 (-955.4, -835.5)       | 1954.7 (1903.4, 1955.2)       | -2550.2 (-3083.8, -1868.2)       |
| Diabetes and kidney diseases                 | 5937.8 (5819.5, 6073.8)       | 8858.3 (8682.6, 8942.2)       | -3144.9 (-3834.0, -3144.9)       |
| Skin and subcutaneous diseases               | 3155.4 (2911.7, 3403.5)       | 6110.8 (5905.8, 6232.8)       | 12054.7 (12054.7, 14761.4)       |
| Musculoskeletal disorders                    | 2099.2 (1596.3, 2618.6)       | 16139.6 (15713.6, 16139.6)    | 41951.6 (40744.5, 49908.3)       |
| Transport injuries                           | -2445.3 (-2472.3, -2417.3)    | 5789.6 (5789.6, 5800.7)       | -27208.2 (-27336.5, -27208.2)    |
| Unintentional injuries                       | -1480.0 (-1495.9, -1464.2)    | 3064.7 (3051.4, 3064.7)       | 7758.9 (7621.3, 7758.9)          |
| Self-harm and interpersonal violence         | 3425.3 (3354.3, 3492.8)       | 6290.9 (6290.7, 6329.6)       | 558.0 (348.5, 933.5)             |
| Other infectious diseases                    | 269.8 (257.4, 282.4)          | 783.8 (783.8, 794.6)          | -3500.0 (-3500.0, -3488.2)       |
| Other non-communicable diseases              | 6202.7 (5961.8, 6409.5)       | 8861.0 (8816.0, 8981.7)       | -19522.2 (-19522.2, -17186.6)    |
| Total                                        | 114533.6 (112234.8, 116813.0) | 187163.0 (185819.1, 187916.7) | -142686.0 (-154374.7, -125015.1) |

**Appendix Table S6B. Decomposition of changes in Disability-adjusted life years for females from 2010 to 2020 (95% UIs)**

| Causes                                       | Age structure              | Population size               | All other reasons               |
|----------------------------------------------|----------------------------|-------------------------------|---------------------------------|
| HIV/AIDS and sexually transmitted infections | -3.9 (-7.5, -0.4)          | 166.4 (162.9, 166.4)          | -749.1 (-749.1, -740.3)         |
| Respiratory infections and tuberculosis      | 1129.7 (1100.7, 1157.7)    | 2007.0 (1999.8, 2010.5)       | -3737.7 (-3842.7, -3737.7)      |
| Enteric infections                           | 554.4 (506.8, 604.4)       | 751.3 (680.8, 751.3)          | 487.3 (170.6, 611.9)            |
| Neglected tropical diseases and malaria      | 477.0 (413.8, 539.1)       | 928.5 (837.7, 928.5)          | -1473.1 (-1473.1, -577.0)       |
| Maternal and neonatal disorders              | 1984.9 (1954.8, 2017.2)    | 3600.9 (3429.9, 3633.0)       | -16885.6 (-16885.6, -15302.5)   |
| Nutritional deficiencies                     | -94.8 (-689.7, 524.1)      | 10018.4 (9706.9, 10198.8)     | 35608.0 (30802.3, 35608.0)      |
| Neoplasms                                    | 14568.2 (14548.5, 14592.0) | 31643.8 (31643.8, 31669.2)    | -31504.0 (-31720.5, -31504.0)   |
| Cardiovascular diseases                      | 27984.9 (27846.9, 28124.2) | 38096.9 (38029.8, 38154.8)    | -32884.5 (-33627.1, -32884.5)   |
| Chronic respiratory diseases                 | 6126.7 (6007.1, 6250.5)    | 9022.6 (9018.7, 9037.0)       | -28959.2 (-29254.2, -28539.7)   |
| Digestive diseases                           | 2748.7 (2704.7, 2791.7)    | 4363.2 (4312.0, 4387.2)       | -4861.4 (-5065.6, -4777.6)      |
| Neurological disorders                       | -3237.4 (-3947.5, -2412.6) | 6992.0 (6323.6, 7143.6)       | 18539.0 (14467.6, 18539.0)      |
| Mental disorders                             | 3711.2 (3571.0, 3850.6)    | 5012.0 (4951.4, 5079.7)       | 1199.9 (125.7, 1199.9)          |
| Substance use disorders                      | -510.7 (-577.0, -444.4)    | 780.7 (734.3, 780.7)          | -6777.6 (-6777.6, -6335.9)      |
| Diabetes and kidney diseases                 | 4482.3 (4386.6, 4581.2)    | 7922.0 (7922.0, 8047.5)       | -7732.9 (-8180.3, -7732.9)      |
| Skin and subcutaneous diseases               | 4897.3 (4593.0, 5243.4)    | 4489.8 (4338.0, 4656.6)       | 12701.6 (12701.6, 13880.0)      |
| Musculoskeletal disorders                    | 9724.4 (8858.3, 10541.6)   | 33376.8 (33291.1, 33657.6)    | -9403.8 (-9403.8, -3486.2)      |
| Transport injuries                           | 371.3 (354.3, 389.6)       | 2893.8 (2893.8, 2930.4)       | -8527.7 (-8547.3, -8464.4)      |
| Unintentional injuries                       | -819.5 (-866.0, -776.8)    | 2744.7 (2738.0, 2773.5)       | 3086.3 (2913.1, 3086.3)         |
| Self-harm and interpersonal violence         | 3203.6 (3097.8, 3315.0)    | 5655.4 (5616.5, 5747.2)       | 7231.2 (7150.2, 7900.2)         |
| Other infectious diseases                    | 200.8 (187.3, 213.8)       | 666.6 (662.6, 666.6)          | -1364.6 (-1364.6, -1251.9)      |
| Other non-communicable diseases              | 4077.3 (3613.3, 4488.4)    | 23554.3 (23554.3, 24706.0)    | -25436.7 (-29706.3, -25436.7)   |
| Total                                        | 81576.4 (77657.2, 85590.3) | 194687.1 (192847.9, 197126.1) | -101444.6 (-118266.7, -89946.0) |

**Appendix Table S6C. Decomposition of changes in Disability-adjusted life years for males from 2020 to 2030 (95% UIs)**

| Causes                                       | Age structure                 | Population size               | All other reasons                |
|----------------------------------------------|-------------------------------|-------------------------------|----------------------------------|
| HIV/AIDS and sexually transmitted infections | 110.1 (107.5, 112.8)          | 550.8 (549.4, 550.8)          | 813.4 (813.4, 830.8)             |
| Respiratory infections and tuberculosis      | 2489.1 (2467.2, 2511.4)       | 2473.9 (2471.6, 2473.9)       | -8700.7 (-8704.9, -8665.8)       |
| Enteric infections                           | 2058.5 (2007.2, 2110.1)       | 2562.0 (2562.0, 2591.9)       | 12952.0 (12571.9, 12952.0)       |
| Neglected tropical diseases and malaria      | 624.4 (594.7, 652.4)          | 963.4 (900.6, 963.4)          | -1245.9 (-1246.9, -477.4)        |
| Maternal and neonatal disorders              | -210.7 (-242.3, -177.7)       | 2238.0 (2238.0, 2238.9)       | -6386.7 (-6408.8, -6385.8)       |
| Nutritional deficiencies                     | 8330.7 (8102.1, 8559.0)       | 10958.1 (10876.1, 11042.3)    | 54410.3 (53309.1, 55484.9)       |
| Neoplasms                                    | 41833.8 (41796.2, 41869.6)    | 40897.4 (40885.5, 40911.8)    | -104173.7 (-104360.6, -104015.9) |
| Cardiovascular diseases                      | 63532.6 (63401.7, 63660.4)    | 43107.6 (43107.6, 43201.1)    | -107730.4 (-108906.3, -107690.2) |
| Chronic respiratory diseases                 | 28436.3 (28369.2, 28503.1)    | 14377.5 (14353.0, 14387.0)    | -22504.5 (-22644.1, -22183.5)    |
| Digestive diseases                           | 5347.9 (5311.6, 5381.3)       | 6095.2 (6095.2, 6118.1)       | -16854.7 (-17144.2, -16854.7)    |
| Neurological disorders                       | 1365.2 (1136.7, 1601.6)       | 5706.5 (5682.5, 5798.7)       | 12007.0 (10978.7, 12209.4)       |
| Mental disorders                             | 1734.7 (1655.7, 1807.5)       | 2770.5 (2686.0, 2853.0)       | -27132.0 (-28004.4, -26236.1)    |
| Substance use disorders                      | -502.5 (-559.4, -446.9)       | 1345.7 (1345.7, 1403.2)       | -3927.1 (-4599.4, -3927.1)       |
| Diabetes and kidney diseases                 | 9433.8 (9324.0, 9537.4)       | 9202.0 (9162.3, 9202.0)       | -18624.5 (-18624.5, -18104.9)    |
| Skin and subcutaneous diseases               | 33628.4 (33436.0, 33827.0)    | 27467.9 (26998.1, 27467.9)    | 214946.0 (214946.0, 220688.5)    |
| Musculoskeletal disorders                    | 47634.7 (47176.5, 48105.4)    | 61768.8 (61616.3, 61849.7)    | 460046.4 (458894.9, 462057.6)    |
| Transport injuries                           | 1145.4 (1118.4, 1169.3)       | 2866.4 (2855.7, 2883.8)       | -8640.7 (-8860.0, -8501.6)       |
| Unintentional injuries                       | 297.2 (284.7, 309.0)          | 4159.4 (4154.2, 4162.3)       | 2671.4 (2632.7, 2739.5)          |
| Self-harm and interpersonal violence         | 6701.9 (6600.5, 6817.4)       | 8048.4 (8024.7, 8103.3)       | 2442.0 (1736.6, 2766.3)          |
| Other infectious diseases                    | 1.2 (-3.4, 5.7)               | 414.8 (414.8, 416.8)          | -1233.9 (-1260.1, -1233.9)       |
| Other non-communicable diseases              | 5471.2 (5277.4, 5662.5)       | 8249.2 (8249.2, 8489.9)       | -6834.2 (-9811.7, -6834.2)       |
| Total                                        | 259463.9 (257362.2, 261578.3) | 256223.5 (255228.5, 257109.8) | 426299.5 (415307.4, 438617.9)    |

**Appendix Table S6D. Decomposition of changes in Disability-adjusted life years for females from 2020 to 2030 (95% *UIs*)**

| Causes                                       | Age structure                 | Population size               | All other reasons                |
|----------------------------------------------|-------------------------------|-------------------------------|----------------------------------|
| HIV/AIDS and sexually transmitted infections | 64.2 (62.3, 66.2)             | 105.3 (103.1, 105.5)          | 288.2 (285.2, 315.2)             |
| Respiratory infections and tuberculosis      | 1369.8 (1354.6, 1385.2)       | 1102.5 (1101.0, 1102.5)       | -6841.8 (-6841.8, -6818.5)       |
| Enteric infections                           | 1251.6 (1207.9, 1300.0)       | 1019.5 (1000.3, 1028.5)       | 2081.8 (1955.6, 2328.0)          |
| Neglected tropical diseases and malaria      | 1027.0 (970.1, 1085.9)        | 976.1 (930.9, 1003.8)         | 1102.8 (748.8, 1666.0)           |
| Maternal and neonatal disorders              | -626.1 (-663.1, -592.2)       | 1692.0 (1671.5, 1703.6)       | -96.9 (-222.3, 137.0)            |
| Nutritional deficiencies                     | 57582.2 (57261.9, 57928.9)    | 75124.7 (74780.8, 75124.7)    | 726252.2 (726252.2, 730496.0)    |
| Neoplasms                                    | 26708.4 (26682.3, 26732.0)    | 25079.4 (25060.6, 25079.4)    | -52177.6 (-52177.6, -51942.5)    |
| Cardiovascular diseases                      | 64800.5 (64552.2, 65049.9)    | 31504.4 (31401.8, 31583.0)    | -107431.4 (-108466.5, -106109.3) |
| Chronic respiratory diseases                 | 14689.4 (14583.1, 14799.8)    | 6846.1 (6805.8, 6893.3)       | -0.7 (-607.7, 521.7)             |
| Digestive diseases                           | 5190.7 (5137.8, 5243.2)       | 3294.9 (3277.7, 3303.2)       | -11176.9 (-11295.5, -10951.4)    |
| Neurological disorders                       | 5085.2 (4580.6, 5625.8)       | 12157.4 (12151.9, 12411.4)    | 56729.5 (53482.8, 56982.8)       |
| Mental disorders                             | 2953.8 (2831.4, 3073.6)       | 3681.9 (3678.2, 3976.5)       | -37066.7 (-40036.7, -36983.6)    |
| Substance use disorders                      | 5.6 (5.3, 5.9)                | 36.0 (35.9, 36.2)             | 407.3 (405.7, 409.5)             |
| Diabetes and kidney diseases                 | 13103.0 (12998.0, 13207.0)    | 9000.6 (8987.9, 9041.9)       | 14562.7 (14028.6, 14754.4)       |
| Skin and subcutaneous diseases               | 15253.7 (15066.0, 15435.2)    | 9335.8 (9155.0, 9364.8)       | 31401.2 (30985.3, 33639.1)       |
| Musculoskeletal disorders                    | 41738.8 (40994.2, 42432.4)    | 62785.9 (62128.0, 63636.6)    | 365745.2 (355286.1, 373912.3)    |
| Transport injuries                           | 889.1 (868.5, 910.6)          | 1599.9 (1599.9, 1602.7)       | -3516.1 (-3548.3, -3516.1)       |
| Unintentional injuries                       | 364.7 (323.5, 405.4)          | 2696.9 (2696.9, 2712.4)       | 107.5 (-63.3, 107.5)             |
| Self-harm and interpersonal violence         | 10481.5 (10293.9, 10679.0)    | 7594.8 (7523.3, 7652.0)       | 6269.7 (5510.0, 7197.2)          |
| Other infectious diseases                    | 113.0 (102.5, 123.5)          | 429.6 (427.2, 434.2)          | -597.0 (-655.3, -563.7)          |
| Other non-communicable diseases              | 10170.1 (9646.0, 10683.0)     | 16428.5 (16428.5, 16894.7)    | -51714.9 (-57495.7, -51714.9)    |
| Total                                        | 272216.2 (268859.0, 275580.3) | 272492.2 (270946.2, 274690.9) | 934328.1 (907529.6, 953866.7)    |

**Appendix Table S7. The absolute number and percentage of changes in the disease burden in 2030 compared to 2020 (95% UIs)**

|                   | Scenario 1                     |                   | Scenario 2                     |                   |
|-------------------|--------------------------------|-------------------|--------------------------------|-------------------|
|                   | Absolute number (person-years) | Percentage (%)    | Absolute number (person-years) | Percentage (%)    |
| Mortality burden  |                                |                   |                                |                   |
| Males             | 319625.7 (280663.5, 360776.0)  | 45.0 (39.5, 50.8) | -20977.2 (-49699.1, 9578.0)    | -2.9 (-7.0, 1.3)  |
| Females           | 234507.8 (213316.0, 255112.9)  | 54.7 (49.8, 59.5) | -5598.5 (-20901.8, 9709.4)     | -1.3 (-4.9, 2.3)  |
| Disability burden |                                |                   |                                |                   |
| Males             | 127506.8 (103455.9, 152860.2)  | 31.8 (25.8, 38.2) | 50818.6 (30539.9, 72260.1)     | 12.7 (7.6, 18.0)  |
| Females           | 178062.0 (149258.9, 207560.0)  | 33.8 (28.3, 39.4) | 77367.6 (53714.5, 101388.0)    | 14.7 (10.2, 19.2) |

**Appendix Table S8A. In Scenario 1, the absolute number and percentage of increase in the disease burden for males in 2030 compared to 2020, by cause (95% UIs)**

| Causes                                       | Mortality burden               |                   | Disability burden              |                   |
|----------------------------------------------|--------------------------------|-------------------|--------------------------------|-------------------|
|                                              | Absolute number (person-years) | Percentage (%)    | Absolute number (person-years) | Percentage (%)    |
| HIV/AIDS and sexually transmitted infections | 458.5 (308.8, 617.4)           | 20.4 (13.7, 27.4) | 83.2 (58.7, 109.1)             | 21.8 (15.4, 28.6) |
| Respiratory infections and tuberculosis      | 5705.3 (4923.2, 6540.8)        | 47.0 (40.5, 53.8) | 1045.5 (763.4, 1341.8)         | 26.0 (19.0, 33.3) |
| Enteric infections                           | 323.2 (164.8, 495.9)           | 23.4 (11.9, 35.9) | 1927.2 (1418.4, 2464.6)        | 30.8 (22.7, 39.4) |
| Neglected tropical diseases and malaria      | 99.3 (81.5, 118.1)             | 27.8 (22.8, 33.0) | 1545.6 (1285.0, 1819.6)        | 29.1 (24.2, 34.3) |
| Maternal and neonatal disorders              | 1024.8 (-536.8, 2828.1)        | 18.0 (-9.4, 49.7) | 1368.7 (548.5, 2238.2)         | 13.9 (5.6, 22.7)  |
| Nutritional deficiencies                     | 2698.2 (2490.2, 2913.5)        | 63.7 (58.8, 68.8) | 11950.6 (10475.1, 13504.2)     | 42.5 (37.3, 48.0) |
| Neoplasms                                    | 99418.7 (87300.0, 112122.4)    | 40.5 (35.6, 45.7) | 2734.8 (2425.7, 3058.4)        | 43.1 (38.2, 48.2) |
| Cardiovascular diseases                      | 120453.9 (109073.0, 132319.1)  | 51.4 (46.5, 56.4) | 9630.3 (8657.5, 10645.3)       | 47.2 (42.5, 52.2) |
| Chronic respiratory diseases                 | 42737.7 (39850.6, 45726.6)     | 66.8 (62.3, 71.5) | 6177.0 (5660.1, 6714.9)        | 53.6 (49.1, 58.3) |
| Digestive diseases                           | 11750.3 (10026.7, 13572.2)     | 39.1 (33.4, 45.2) | 2694.1 (2177.1, 3241.7)        | 30.8 (24.9, 37.0) |
| Neurological disorders                       | 2541.0 (2026.8, 3095.0)        | 36.9 (29.4, 44.9) | 2783.5 (1343.6, 4315.3)        | 14.8 (7.2, 23.0)  |
| Mental disorders                             | 0.0 (0.0, 0.0)                 | 0.0 (0.0, 0.0)    | 8986.8 (7768.9, 10269.3)       | 37.9 (32.7, 43.3) |
| Substance use disorders                      | 403.1 (217.3, 600.1)           | 16.0 (8.6, 23.9)  | 584.5 (31.5, 1172.4)           | 8.0 (0.4, 16.0)   |
| Diabetes and kidney diseases                 | 12348.7 (10920.5, 13848.8)     | 44.0 (38.9, 49.3) | 9128.6 (7726.2, 10602.9)       | 34.7 (29.3, 40.3) |
| Skin and subcutaneous diseases               | 389.4 (341.3, 439.8)           | 41.6 (36.5, 47.0) | 11082.3 (8454.7, 13853.1)      | 25.4 (19.4, 31.7) |
| Musculoskeletal disorders                    | 592.3 (471.1, 724.7)           | 39.7 (31.6, 48.6) | 34352.2 (26530.5, 42603.7)     | 28.6 (22.1, 35.5) |
| Transport injuries                           | 3445.2 (2476.4, 4471.4)        | 23.3 (16.7, 30.2) | 1722.2 (1496.6, 1959.0)        | 39.2 (34.1, 44.6) |
| Unintentional injuries                       | 3835.9 (2533.2, 5227.0)        | 20.5 (13.6, 28.0) | 630.1 (444.1, 827.3)           | 22.2 (15.7, 29.2) |
| Self-harm and interpersonal violence         | 8606.3 (6487.5, 10890.2)       | 32.4 (24.4, 41.0) | 5992.6 (5282.7, 6736.5)        | 44.2 (39.0, 49.7) |
| Other infectious diseases                    | 401.4 (209.5, 614.3)           | 21.1 (11.0, 32.3) | 119.6 (54.4, 189.1)            | 12.3 (5.6, 19.4)  |
| Other non-communicable diseases              | 2392.3 (1297.9, 3610.6)        | 26.2 (14.2, 39.5) | 12967.4 (10853.2, 15193.8)     | 34.4 (28.8, 40.3) |



| Causes | Mortality burden               |                   | Disability burden              |                   |
|--------|--------------------------------|-------------------|--------------------------------|-------------------|
|        | Absolute number (person-years) | Percentage (%)    | Absolute number (person-years) | Percentage (%)    |
| Total  | 319625.7 (280663.5, 360776.0)  | 45.0 (39.5, 50.8) | 127506.8 (103455.9, 152860.2)  | 31.8 (25.8, 38.2) |

**Appendix Table S8B. In Scenario 1, the absolute number and percentage of increase in the disease burden for females in 2030 compared to 2020, by cause (95% UIs)**

| Causes                                       | Mortality burden               |                      | Disability burden              |                   |
|----------------------------------------------|--------------------------------|----------------------|--------------------------------|-------------------|
|                                              | Absolute number (person-years) | Percentage (%)       | Absolute number (person-years) | Percentage (%)    |
| HIV/AIDS and sexually transmitted infections | 97.5 (81.3, 114.2)             | 37.7 (31.5, 44.2)    | 61.5 (52.2, 71.0)              | 41.9 (35.5, 48.3) |
| Respiratory infections and tuberculosis      | 3478.4 (3179.4, 3762.9)        | 60.2 (55.1, 65.2)    | 512.6 (352.2, 680.7)           | 21.0 (14.5, 27.9) |
| Enteric infections                           | 309.3 (212.9, 412.7)           | 39.8 (27.4, 53.1)    | 1263.2 (1029.2, 1497.5)        | 39.3 (32.0, 46.6) |
| Neglected tropical diseases and malaria      | 79.3 (74.4, 84.0)              | 48.6 (45.7, 51.5)    | 1936.0 (1816.8, 2052.1)        | 48.4 (45.4, 51.3) |
| Maternal and neonatal disorders              | 876.4 (-165.7, 2076.7)         | 22.8 (-4.3, 54.1)    | 253.4 (-206.1, 731.4)          | 4.5 (-3.6, 12.9)  |
| Nutritional deficiencies                     | 4451.0 (4152.6, 4702.7)        | 69.6 (64.9, 73.5)    | 15740.2 (11518.8, 20117.9)     | 25.5 (18.7, 32.6) |
| Neoplasms                                    | 59534.1 (52726.3, 66425.2)     | 41.8 (37.0, 46.6)    | 2025.7 (1765.9, 2290.4)        | 39.2 (34.2, 44.3) |
| Cardiovascular diseases                      | 109967.0 (103605.9, 115572.2)  | 68.5 (64.6, 72.0)    | 15802.1 (14777.9, 16749.7)     | 61.8 (57.8, 65.6) |
| Chronic respiratory diseases                 | 15622.1 (14794.8, 16316.1)     | 74.3 (70.4, 77.6)    | 6288.2 (5846.9, 6712.0)        | 64.7 (60.1, 69.0) |
| Digestive diseases                           | 8200.0 (7697.0, 8651.2)        | 64.3 (60.4, 67.9)    | 3308.3 (2949.4, 3666.4)        | 44.0 (39.2, 48.7) |
| Neurological disorders                       | 3214.2 (2834.0, 3599.4)        | 50.0 (44.1, 56.0)    | 8159.0 (5885.2, 10560.5)       | 24.8 (17.9, 32.0) |
| Mental disorders                             | 62.6 (60.5, 64.2)              | 115.4 (111.7, 118.5) | 13750.0 (12329.1, 15192.7)     | 43.5 (39.0, 48.0) |
| Substance use disorders                      | 0.0 (0.0, 0.0)                 | 0.0 (0.0, 0.0)       | 4.7 (4.1, 5.4)                 | 50.2 (43.9, 56.9) |
| Diabetes and kidney diseases                 | 10808.6 (9991.7, 11594.6)      | 56.2 (51.9, 60.3)    | 7937.7 (7093.0, 8780.4)        | 43.4 (38.8, 48.0) |
| Skin and subcutaneous diseases               | 500.9 (471.8, 526.6)           | 63.2 (59.5, 66.4)    | 12897.4 (11753.4, 14041.5)     | 41.2 (37.5, 44.8) |
| Musculoskeletal disorders                    | 854.3 (678.7, 1033.7)          | 27.4 (21.8, 33.1)    | 45036.2 (36065.0, 54312.9)     | 27.6 (22.1, 33.2) |
| Transport injuries                           | 1464.7 (1035.5, 1915.0)        | 23.3 (16.5, 30.5)    | 1504.4 (1329.0, 1682.2)        | 40.6 (35.9, 45.4) |
| Unintentional injuries                       | 2342.6 (1715.4, 2998.9)        | 23.6 (17.3, 30.3)    | 796.6 (466.7, 1144.4)          | 16.9 (9.9, 24.3)  |
| Self-harm and interpersonal violence         | 8683.6 (7441.9, 9941.8)        | 48.0 (41.1, 55.0)    | 8538.5 (7813.8, 9225.4)        | 53.9 (49.3, 58.2) |
| Other infectious diseases                    | 393.1 (260.9, 535.1)           | 29.8 (19.7, 40.5)    | 269.9 (183.1, 360.8)           | 21.2 (14.4, 28.3) |
| Other non-communicable diseases              | 3568.3 (2466.7, 4785.7)        | 38.9 (26.9, 52.2)    | 31976.4 (26433.3, 37684.7)     | 32.5 (26.8, 38.3) |

| Causes | Mortality burden               |                   | Disability burden              |                   |
|--------|--------------------------------|-------------------|--------------------------------|-------------------|
|        | Absolute number (person-years) | Percentage (%)    | Absolute number (person-years) | Percentage (%)    |
| Total  | 234507.8 (213316.0, 255112.9)  | 54.7 (49.8, 59.5) | 178062.0 (149258.9, 207560.0)  | 33.8 (28.3, 39.4) |

**Appendix Table S8C. In Scenario 2, the absolute number and percentage of increase in the disease burden for males in 2030 compared to 2020, by cause (95% UIs)**

| Causes                                       | Mortality burden               |                      | Disability burden              |                      |
|----------------------------------------------|--------------------------------|----------------------|--------------------------------|----------------------|
|                                              | Absolute number (person-years) | Percentage (%)       | Absolute number (person-years) | Percentage (%)       |
| HIV/AIDS and sexually transmitted infections | 1493.5 (1280.3, 1719.7)        | 66.3 (56.8, 76.3)    | -12.8 (-32.6, 8.1)             | -3.3 (-8.5, 2.1)     |
| Respiratory infections and tuberculosis      | -3094.2 (-3574.0, -2574.3)     | -25.5 (-29.4, -21.2) | -615.1 (-807.5, -411.3)        | -15.3 (-20.1, -10.2) |
| Enteric infections                           | 389.5 (188.3, 613.3)           | 28.2 (13.6, 44.4)    | 17228.7 (15935.8, 18614.5)     | 275.2 (254.6, 297.4) |
| Neglected tropical diseases and malaria      | 121.1 (96.7, 147.0)            | 33.9 (27.1, 41.1)    | 183.9 (-50.4, 430.7)           | 3.5 (-0.9, 8.1)      |
| Maternal and neonatal disorders              | 4587.5 (2234.3, 7304.1)        | 80.7 (39.3, 128.5)   | -9023.2 (-9143.4, -8889.3)     | -91.5 (-92.7, -90.1) |
| Nutritional deficiencies                     | 2009.3 (1624.7, 2424.7)        | 47.4 (38.4, 57.3)    | 71293.2 (65877.9, 77062.0)     | 253.5 (234.3, 274.0) |
| Neoplasms                                    | -24543.1 (-32723.9, -15953.7)  | -10.0 (-13.3, -6.5)  | 3049.6 (2709.2, 3406.8)        | 48.1 (42.7, 53.7)    |
| Cardiovascular diseases                      | -10357.9 (-17480.4, -2924.6)   | -4.4 (-7.5, -1.2)    | 8740.5 (7798.4, 9724.7)        | 42.9 (38.3, 47.7)    |
| Chronic respiratory diseases                 | 14665.2 (12569.3, 16830.7)     | 22.9 (19.6, 26.3)    | 5652.6 (5121.3, 6206.6)        | 49.1 (44.4, 53.9)    |
| Digestive diseases                           | -6611.4 (-7609.2, -5557.9)     | -22.0 (-25.3, -18.5) | 946.4 (484.7, 1434.4)          | 10.8 (5.5, 16.4)     |
| Neurological disorders                       | 3960.1 (3412.5, 4546.2)        | 57.5 (49.6, 66.0)    | 15151.0 (13070.2, 17358.6)     | 80.8 (69.7, 92.5)    |
| Mental disorders                             | 503.2 (475.8, 532.3)           | 100.0 (100.0, 100.0) | -23152.3 (-23189.0, -23113.2)  | -97.6 (-97.7, -97.4) |
| Substance use disorders                      | -848.9 (-951.9, -739.8)        | -33.8 (-37.9, -29.4) | -2507.9 (-2833.0, -2162.8)     | -34.3 (-38.7, -29.6) |
| Diabetes and kidney diseases                 | -861.6 (-1781.2, 100.4)        | -3.1 (-6.3, 0.4)     | 1178.4 (110.6, 2300.3)         | 4.5 (0.4, 8.7)       |
| Skin and subcutaneous diseases               | -800.7 (-806.3, -794.7)        | -85.5 (-86.1, -84.9) | -11397.3 (-12344.1, -10409.8)  | -26.1 (-28.3, -23.8) |
| Musculoskeletal disorders                    | -1221.6 (-1233.0, -1209.5)     | -81.9 (-82.6, -81.1) | -51366.3 (-53971.8, -48630.6)  | -42.8 (-44.9, -40.5) |
| Transport injuries                           | -6039.9 (-6552.7, -5494.6)     | -40.8 (-44.3, -37.1) | 1385.9 (1145.4, 1639.3)        | 31.6 (26.1, 37.3)    |
| Unintentional injuries                       | 5864.3 (4419.9, 7396.2)        | 31.4 (23.7, 39.6)    | 1343.6 (1094.2, 1607.8)        | 47.4 (38.6, 56.7)    |
| Self-harm and interpersonal violence         | -1395.3 (-2986.0, 315.6)       | -5.2 (-11.2, 1.2)    | 18770.1 (17516.8, 20085.1)     | 138.5 (129.3, 148.2) |
| Other infectious diseases                    | -572.8 (-686.0, -449.3)        | -30.1 (-36.1, -23.6) | -259.6 (-303.7, -212.8)        | -26.6 (-31.2, -21.8) |
| Other non-communicable diseases              | 1776.5 (383.7, 3346.2)         | 19.5 (4.2, 36.6)     | 4229.0 (2350.9, 6211.0)        | 11.2 (6.2, 16.5)     |

| Causes | Mortality burden               |                  | Disability burden              |                  |
|--------|--------------------------------|------------------|--------------------------------|------------------|
|        | Absolute number (person-years) | Percentage (%)   | Absolute number (person-years) | Percentage (%)   |
| Total  | -20977.2 (-49699.1, 9578.0)    | -2.9 (-7.0, 1.3) | 50818.6 (30539.9, 72260.1)     | 12.7 (7.6, 18.0) |

**Appendix Table S8D. In Scenario 2, the absolute number and percentage of increase in the disease burden for females in 2030 compared to 2020, by cause (95% UIs)**

| Causes                                       | Mortality burden               |                      | Disability burden               |                         |
|----------------------------------------------|--------------------------------|----------------------|---------------------------------|-------------------------|
|                                              | Absolute number (person-years) | Percentage (%)       | Absolute number (person-years)  | Percentage (%)          |
| HIV/AIDS and sexually transmitted infections | 340.6 (309.7, 372.7)           | 131.8 (119.9, 144.3) | 124.5 (109.8, 139.7)            | 84.7 (74.7, 95.0)       |
| Respiratory infections and tuberculosis      | -3273.8 (-3406.6, -3135.9)     | -56.7 (-59.0, -54.3) | -1039.4 (-1120.8, -954.0)       | -42.7 (-46.0, -39.2)    |
| Enteric infections                           | 98.0 (29.9, 171.2)             | 12.6 (3.8, 22.0)     | 4474.5 (4180.5, 4763.2)         | 139.3 (130.2, 148.3)    |
| Neglected tropical diseases and malaria      | 279.6 (257.3, 302.8)           | 171.6 (157.9, 185.8) | 3006.6 (2723.9, 3294.9)         | 75.2 (68.1, 82.4)       |
| Maternal and neonatal disorders              | 3452.4 (1827.5, 5324.9)        | 89.9 (47.6, 138.6)   | -2383.0 (-2748.1, -1989.8)      | -42.0 (-48.5, -35.1)    |
| Nutritional deficiencies                     | -4373.0 (-4443.2, -4307.8)     | -68.4 (-69.5, -67.4) | 29142.5 (25128.2, 33328.4)      | 47.2 (40.7, 54.0)       |
| Neoplasms                                    | -2807.0 (-7680.0, 2146.9)      | -2.0 (-5.4, 1.5)     | 2494.2 (2206.8, 2787.8)         | 48.2 (42.7, 53.9)       |
| Cardiovascular diseases                      | -21693.5 (-24999.2, -18737.7)  | -13.5 (-15.6, -11.7) | 10776.2 (9842.8, 11652.7)       | 42.2 (38.5, 45.6)       |
| Chronic respiratory diseases                 | 7308.6 (6683.2, 7829.6)        | 34.8 (31.8, 37.2)    | 14243.9 (13634.8, 14803.3)      | 146.5 (140.2, 152.2)    |
| Digestive diseases                           | -3621.9 (-3891.0, -3365.6)     | -28.4 (-30.5, -26.4) | 861.6 (542.1, 1185.9)           | 11.4 (7.2, 15.8)        |
| Neurological disorders                       | 5501.5 (4990.2, 6021.5)        | 85.5 (77.6, 93.6)    | 67927.8 (62498.6, 73593.6)      | 206.1 (189.7, 223.3)    |
| Mental disorders                             | 146.6 (135.8, 157.6)           | 270.5 (250.6, 290.9) | -31496.7 (-31505.7, -31487.3)   | -99.6 (-99.6, -99.5)    |
| Substance use disorders                      | 154.9 (145.3, 164.8)           | 100.0 (100.0, 100.0) | 294.4 (276.1, 313.6)            | 3122.7 (2928.3, 3326.5) |
| Diabetes and kidney diseases                 | 17950.2 (16988.7, 18866.6)     | 93.3 (88.3, 98.1)    | 18643.1 (17512.9, 19759.1)      | 101.9 (95.7, 108.0)     |
| Skin and subcutaneous diseases               | 288.0 (255.6, 318.4)           | 36.3 (32.2, 40.2)    | 56188.7 (54351.1, 57876.9)      | 179.4 (173.6, 184.8)    |
| Musculoskeletal disorders                    | -2644.4 (-2666.1, -2622.0)     | -84.8 (-85.5, -84.1) | -100195.6 (-102728.3, -97597.5) | -61.3 (-62.8, -59.7)    |
| Transport injuries                           | -2760.4 (-2974.0, -2536.0)     | -43.9 (-47.3, -40.4) | 1688.9 (1483.9, 1898.0)         | 45.6 (40.1, 51.3)       |
| Unintentional injuries                       | 980.2 (421.8, 1564.4)          | 9.9 (4.3, 15.8)      | 2139.7 (1726.6, 2575.0)         | 45.4 (36.6, 54.6)       |
| Self-harm and interpersonal violence         | 949.5 (-22.6, 1943.1)          | 5.3 (-0.1, 10.7)     | 23590.8 (22340.1, 24802.4)      | 148.9 (141.0, 156.5)    |
| Other infectious diseases                    | 20.6 (-100.3, 152.6)           | 1.6 (-7.6, 11.5)     | -108.0 (-173.5, -39.4)          | -8.5 (-13.6, -3.1)      |
| Other non-communicable diseases              | -1895.4 (-2763.8, -922.7)      | -20.7 (-30.2, -10.1) | -23007.2 (-26567.3, -19318.5)   | -23.4 (-27.0, -19.6)    |

| Causes | Mortality burden               |                  | Disability burden              |                   |
|--------|--------------------------------|------------------|--------------------------------|-------------------|
|        | Absolute number (person-years) | Percentage (%)   | Absolute number (person-years) | Percentage (%)    |
| Total  | -5598.5 (-20901.8, 9709.4)     | -1.3 (-4.9, 2.3) | 77367.6 (53714.5, 101388.0)    | 14.7 (10.2, 19.2) |

**Appendix Table S9A. Expected burden of disease for males in 2030 and the reduction compared to 2020, by cause (95% UIs)**

| Causes                                       | Mortality burden                  |                       | Disability burden                 |                      |
|----------------------------------------------|-----------------------------------|-----------------------|-----------------------------------|----------------------|
|                                              | (person-years per 100,000 people) |                       | (person-years per 100,000 people) |                      |
|                                              | Expectation                       | Reduction             | Expectation                       | Reduction            |
| HIV/AIDS and sexually transmitted infections | 39.0 (36.4, 41.8)                 | 7.0 (4.2, 9.6)        | 6.6 (6.2, 7.1)                    | 1.2 (0.7, 1.6)       |
| Respiratory infections and tuberculosis      | 210.4 (196.4, 225.5)              | 38.0 (22.9, 52.0)     | 69.7 (65.1, 74.7)                 | 12.6 (7.6, 17.2)     |
| Enteric infections                           | 23.9 (22.3, 25.6)                 | 4.3 (2.6, 5.9)        | 108.4 (101.2, 116.1)              | 19.6 (11.8, 26.8)    |
| Neglected tropical diseases and malaria      | 6.2 (5.8, 6.6)                    | 1.1 (0.7, 1.5)        | 92.0 (85.9, 98.6)                 | 16.6 (10.0, 22.7)    |
| Maternal and neonatal disorders              | 98.4 (91.9, 105.5)                | 17.8 (10.7, 24.3)     | 170.7 (159.4, 183.0)              | 30.8 (18.6, 42.2)    |
| Nutritional deficiencies                     | 73.3 (68.4, 78.6)                 | 13.2 (8.0, 18.1)      | 486.8 (454.5, 521.7)              | 87.9 (53.0, 120.3)   |
| Neoplasms                                    | 4246.4 (3964.4, 4551.2)           | 767.1 (462.3, 1049.1) | 109.8 (102.5, 117.7)              | 19.8 (12.0, 27.1)    |
| Cardiovascular diseases                      | 4059.5 (3789.9, 4350.9)           | 733.4 (442.0, 1002.9) | 352.9 (329.5, 378.3)              | 63.8 (38.4, 87.2)    |
| Chronic respiratory diseases                 | 1107.9 (1034.3, 1187.4)           | 200.1 (120.6, 273.7)  | 199.5 (186.2, 213.8)              | 36.0 (21.7, 49.3)    |
| Digestive diseases                           | 519.8 (485.3, 557.1)              | 93.9 (56.6, 128.4)    | 151.5 (141.5, 162.4)              | 27.4 (16.5, 37.4)    |
| Neurological disorders                       | 119.2 (111.3, 127.8)              | 21.5 (13.0, 29.5)     | 324.7 (303.2, 348.0)              | 58.7 (35.4, 80.2)    |
| Mental disorders                             | 0.0 (0.0, 0.0)                    | 0.0 (0.0, 0.0)        | 410.8 (383.5, 440.3)              | 88.8 (59.3, 116.1)   |
| Substance use disorders                      | 43.5 (40.6, 46.6)                 | 7.9 (4.7, 10.8)       | 126.6 (118.2, 135.6)              | 22.9 (13.8, 31.3)    |
| Diabetes and kidney diseases                 | 486.2 (453.9, 521.1)              | 87.8 (52.9, 120.1)    | 455.9 (425.6, 488.6)              | 82.4 (49.6, 112.6)   |
| Skin and subcutaneous diseases               | 16.2 (15.1, 17.4)                 | 2.9 (1.8, 4.0)        | 755.7 (705.5, 809.9)              | 136.5 (82.3, 186.7)  |
| Musculoskeletal disorders                    | 25.8 (24.1, 27.7)                 | 4.7 (2.8, 6.4)        | 2079.1 (1941.1, 2228.4)           | 375.6 (226.4, 513.7) |
| Transport injuries                           | 256.2 (239.2, 274.6)              | 46.3 (27.9, 63.3)     | 76.0 (71.0, 81.5)                 | 13.7 (8.3, 18.8)     |
| Unintentional injuries                       | 323.2 (301.7, 346.4)              | 58.4 (35.2, 79.8)     | 49.1 (45.8, 52.6)                 | 8.9 (5.3, 12.1)      |
| Self-harm and interpersonal violence         | 460.2 (429.7, 493.3)              | 83.1 (50.1, 113.7)    | 234.5 (219.0, 251.4)              | 42.4 (25.5, 57.9)    |
| Other infectious diseases                    | 32.9 (30.7, 35.3)                 | 5.9 (3.6, 8.1)        | 16.9 (15.8, 18.1)                 | 3.0 (1.8, 4.2)       |
| Other non-communicable diseases              | 158.1 (147.6, 169.4)              | 28.6 (17.2, 39.1)     | 653.5 (610.1, 700.4)              | 118.1 (71.1, 161.4)  |



| Causes | Mortality burden                  |                         | Disability burden                 |                         |
|--------|-----------------------------------|-------------------------|-----------------------------------|-------------------------|
|        | (person-years per 100,000 people) |                         | (person-years per 100,000 people) |                         |
|        | Expectation                       | Reduction               | Expectation                       | Reduction               |
| Total  | 12306.3 (11489.0, 13189.8)        | 2223.2 (1339.8, 3040.3) | 6930.71 (6470.8, 7428.2)          | 1266.69 (769.1, 1726.8) |

**Appendix Table S9B. Expected burden of disease for females in 2030 and the reduction compared to 2020, by cause (95% UIs)**

| Causes                                       | Mortality burden                  |                      | Disability burden                 |                      |
|----------------------------------------------|-----------------------------------|----------------------|-----------------------------------|----------------------|
|                                              | (person-years per 100,000 people) |                      | (person-years per 100,000 people) |                      |
|                                              | Expectation                       | Reduction            | Expectation                       | Reduction            |
| HIV/AIDS and sexually transmitted infections | 4.4 (4.1, 4.7)                    | 0.8 (0.5, 1.1)       | 2.5 (2.3, 2.7)                    | 0.5 (0.3, 0.6)       |
| Respiratory infections and tuberculosis      | 98.5 (92.3, 105.3)                | 17.9 (11.1, 24.2)    | 41.6 (38.9, 44.4)                 | 7.6 (4.7, 10.2)      |
| Enteric infections                           | 13.3 (12.4, 14.2)                 | 2.4 (1.5, 3.3)       | 54.8 (51.3, 58.6)                 | 10.0 (6.2, 13.5)     |
| Neglected tropical diseases and malaria      | 2.8 (2.6, 3.0)                    | 0.5 (0.3, 0.7)       | 68.3 (63.9, 73.0)                 | 12.4 (7.7, 16.8)     |
| Maternal and neonatal disorders              | 65.5 (61.4, 70.1)                 | 11.9 (7.4, 16.1)     | 96.8 (90.6, 103.4)                | 17.6 (10.9, 23.8)    |
| Nutritional deficiencies                     | 109.1 (102.2, 116.6)              | 19.9 (12.3, 26.8)    | 1053.1 (986.2, 1125.7)            | 191.6 (119.0, 258.6) |
| Neoplasms                                    | 2432.5 (2277.8, 2600.1)           | 442.6 (274.9, 597.2) | 88.2 (82.6, 94.3)                 | 16.0 (10.0, 21.7)    |
| Cardiovascular diseases                      | 2738.3 (2564.2, 2927.0)           | 498.2 (309.5, 672.3) | 436.0 (408.2, 466.0)              | 79.3 (49.3, 107.0)   |
| Chronic respiratory diseases                 | 358.7 (335.9, 383.4)              | 65.3 (40.5, 88.1)    | 165.9 (155.4, 177.3)              | 30.2 (18.7, 40.7)    |
| Digestive diseases                           | 217.5 (203.7, 232.5)              | 39.6 (24.6, 53.4)    | 128.4 (120.2, 137.3)              | 23.4 (14.5, 31.5)    |
| Neurological disorders                       | 109.8 (102.8, 117.3)              | 20.0 (12.4, 26.9)    | 562.3 (526.5, 601.0)              | 102.3 (63.5, 138.0)  |
| Mental disorders                             | 0.9 (0.9, 1.0)                    | 0.2 (0.1, 0.3)       | 539.7 (505.4, 576.9)              | 121.0 (83.8, 155.3)  |
| Substance use disorders                      | 0.0 (0.0, 0.0)                    | 0.0 (0.0, 0.0)       | 0.2 (0.2, 0.2)                    | 0.0 (0.0, 0.0)       |
| Diabetes and kidney diseases                 | 328.2 (307.4, 350.9)              | 59.7 (37.1, 80.6)    | 312.3 (292.4, 333.8)              | 56.8 (35.3, 76.7)    |
| Skin and subcutaneous diseases               | 13.5 (12.7, 14.5)                 | 2.5 (1.5, 3.3)       | 534.3 (500.3, 571.1)              | 97.2 (60.4, 131.2)   |
| Musculoskeletal disorders                    | 53.2 (49.8, 56.9)                 | 9.7 (6.0, 13.1)      | 2789.0 (2611.7, 2981.3)           | 507.4 (315.2, 684.7) |
| Transport injuries                           | 107.2 (100.4, 114.6)              | 19.5 (12.1, 26.3)    | 63.2 (59.1, 67.5)                 | 11.5 (7.1, 15.5)     |
| Unintentional injuries                       | 169.1 (158.4, 180.8)              | 30.8 (19.1, 41.5)    | 80.5 (75.4, 86.0)                 | 14.6 (9.1, 19.8)     |
| Self-harm and interpersonal violence         | 308.6 (289.0, 329.9)              | 56.1 (34.9, 75.8)    | 270.3 (253.2, 289.0)              | 49.2 (30.6, 66.4)    |
| Other infectious diseases                    | 22.5 (21.1, 24.1)                 | 4.1 (2.5, 5.5)       | 21.8 (20.4, 23.3)                 | 4.0 (2.5, 5.3)       |
| Other non-communicable diseases              | 156.4 (146.4, 167.2)              | 28.5 (17.7, 38.4)    | 1680.2 (1573.4, 1796.0)           | 305.7 (189.9, 412.5) |

| Causes | Mortality burden                  |                        | Disability burden                 |                         |
|--------|-----------------------------------|------------------------|-----------------------------------|-------------------------|
|        | (person-years per 100,000 people) |                        | (person-years per 100,000 people) |                         |
|        | Expectation                       | Reduction              | Expectation                       | Reduction               |
| Total  | 7310.1 (6845.5, 7814.1)           | 1330.0 (826.0, 1794.9) | 8989.3 (8417.6, 9608.8)           | 8989.3 (1038.7, 2229.8) |
